## ***Nostoc* talks back: Temporal patterns of differential gene expression during establishment of the *Anthoceros*-*Nostoc* symbiosis**

Poulami Chatterjee<sup>1\*</sup>, Peter Schafran<sup>2,3</sup>, Fay-Wei Li<sup>2,3</sup>, John C Meeks<sup>1\*</sup>

<sup>1</sup>Department of Microbiology and Molecular Genetics, University of California, Davis, CA 95616

<sup>2</sup>Boyce Thompson Institute, Ithaca, NY, USA

<sup>3</sup>Plant Biology Section, Cornell University, Ithaca, NY, USA

### **\*Correspondence:**

Poulami Chatterjee

Tel number: +1 (530) 220 0584

[\\*pchatterjee@ucdavis.edu](mailto:pchatterjee@ucdavis.edu)

John C Meeks

Tel number: +1 (530) 752 3346

[\\*jcmeeks@ucdavis.edu](mailto:jcmeeks@ucdavis.edu)

### **Highlights**

Temporal RNA-Seq analysis revealed how symbiotic cyanobacteria impact plant partners' global gene expression and elucidated the nature of bidirectional communications between the partners

## 1 **Abstract**

2 Endosymbiotic association between hornworts and dinitrogen-fixing cyanobacteria form when  
3 the plant is limited for combined nitrogen (N). We generated RNA-Seq data to examine the  
4 temporal gene expression patterns during culture of N-starved *Anthoceros punctatus* in the  
5 absence and presence of the symbiotically competent cyanobacterium *Nostoc punctiforme*.  
6 Symbiotic nitrogenase activity commenced within 5 days of coculture reaching a maximal by 14  
7 days. In symbiont-free gametophytes, chlorophyll content, chlorophyll fluorescence  
8 characteristics and transcription of genes encoding light harvesting and reaction center proteins,  
9 as well as the small subunit of ribulose-bisphosphate-carboxylase/oxygenase, were  
10 downregulated. The downregulation was complemented in a temporal pattern corresponding to  
11 the *N. punctiforme* provision of N<sub>2</sub>-derived ammonium. The impairment and complementation of  
12 photosynthesis was the most distinctive response of *A. punctatus* to N-starvation. Increases in  
13 transcription of ammonium and nitrate transporters and their *N. punctiforme*-dependent  
14 complementation was also observed. The temporal patterns of differential gene expression  
15 indicated *N. punctiforme* transmits signals to *A. punctatus* both prior to, and after its provision of  
16 fixed N. This is the only known temporal transcriptomic study during establishment of a  
17 symbiotic nitrogen-fixing association in this monophyletic evolutionary lineage of land plants.

18 **Keywords:** Hornwort *Anthoceros punctatus*; Cyanobacterium *Nostoc punctiforme*; Nitrogen  
19 fixation, Nitrogen starvation, RNA sequencing, Symbiosis, Time course

20 **Abbreviations:** CSSP, common symbiotic signaling pathway; HIF, hormogonium inducing  
21 factor

22

## 23 **Introduction**

24 Nitrogen (N) is an essential nutrient for all life on earth and is the most limiting nutritional factor  
25 governing crop productivity around the world (Guo *et al.*, 2019). N-limitation results in  
26 metabolic instability, which in oxygenic photosynthetic organisms is manifest by light-dependent  
27 reductant accumulation leading to the generation of toxic reactive oxygen species.

28 Nitrogen (N) is an essential nutrient for all life on earth and is the most limiting nutritional  
29 factor governing crop productivity around the world (Guo *et al.*, 2019). N-limitation results in  
30 metabolic instability, which in oxygenic photosynthetic organisms is manifest by light-dependent  
31 reductant accumulation leading to the generation of toxic reactive oxygen species.

32 As plants are sedentary, they are dependent on the available nutrients present in their  
33 rhizosphere. They acquire, metabolize, and recycle to maintain their nutrient availability  
34 throughout their life course (Pérez-Jaramillo *et al.*, 2016). Plants perceive and respond to the  
35 stress of N deficiency via numerous physiological and metabolic events (Hsieh *et al.*, 2018),  
36 including enhanced transcription of nitrate and ammonium transporters (Crawford and Glass,  
37 1998; Glass, 2002) and ubiquitination of proteins, leading to their turnover and N recycling (Liu  
38 *et al.*, 2017). The CO<sub>2</sub> fixing enzyme, ribulose-bisphosphate-carboxylase/oxygenase (RuBisCO)  
39 contributes around 50% of the protein content in the leaves and is one of the main reservoirs of  
40 nitrogen (Feller *et al.*, 2008). The N-starvation dependent downregulation of transcription of  
41 plant genes leads to the depletion of RuBisCO, chlorophyll-binding proteins of the light  
42 harvesting complexes, and photosynthetic electron transport (Logan *et al.*, 1999; Paul and  
43 Driscoll, 1997).

44 A few lineages of plants have acquired the ability to establish symbiotic associations with  
45 nitrogen-fixing bacteria, allowing them to colonize N-poor habitats. Because the nitrogenase  
46 enzyme complex is highly sensitive to oxygen inactivation, plants in these associations must  
47 have evolved accommodations for oxygen protection. The most well-known and studied is  
48 associations between leguminous plants and rhizobia bacteria, the latter of which have an  
49 obligate respiratory energy metabolism. Synthesis of legume hemoglobin (leghemoglobin),  
50 through cooperation of both symbiotic partners, modulates oxygen tension in the root nodules  
51 (O'Brian, 1996). Filamentous aerobic actinobacteria, such as *Frankia* spp., fix nitrogen in free-  
52 living and symbiotic growth states in the oxygen-protective, hopanoid lipid-enriched vesicles at  
53 the tips of primary and secondary filaments (Ghodhbane-Gtari *et al.*, 2014). Certain filamentous  
54 cyanobacteria fix nitrogen in specialized cells called heterocysts, which produce a bilayered  
55 glycolipid and polysaccharide outer wall that effectively restricts solute and gas diffusion  
56 (Walsby, 2007). Heterocyst-forming cyanobacteria, mainly of the genus *Nostoc*, establish  
57 symbiotic associations with specific representatives of four of the five major divisions of land

58 plants. Only in association with the angiosperm *Gunnera* spp. is the *Nostoc* symbiont  
59 intracellular in specialized glands at the base of the petiole. In associations with gametophytes of  
60 hornworts and two liverworts, leaves of the water fern *Azolla* spp. and coralloid (secondary)  
61 roots of cycads, the *Nostoc* spp. are endophytic, but extracellular in specialized preformed  
62 cavities or layers (Adams, 2002).

63 Land plants evolved from a charophycean algal ancestor approximately 470-515 million years  
64 ago, and consist of two monophyletic lineages: tracheophytes (vascular plants) and bryophytes  
65 (i.e., mosses, liverworts, and hornworts) (Szövényi *et al.*, 2021). Bryophytes are, perhaps, the  
66 oldest lineage of land plants to form stable long-lasting endosymbiotic associations with  
67 nitrogen-fixing bacteria, in this case oxygenic photoautotrophic cyanobacteria (Sprent and  
68 Raven, 1985). We have utilized pure cultures of the hornwort *Anthoceros punctatus* and the  
69 model symbiotic cyanobacterium *Nostoc punctiforme* strain American Type Culture Collection  
70 29133 (syn Pasteur Culture Collection 73102) (hereafter *N. punctiforme*) as an experimental  
71 system. Some form of motility in at least one partner is required for efficient establishment of a  
72 symbiosis. *Nostoc* spp. vegetative filaments are nonmotile and motility requires the transient  
73 differentiation of motile-by-gliding filaments called hormogonia; hormogonium filaments lack  
74 heterocysts, do not fix nitrogen and are growth-arrested (Tandeau de Marsac, 1994). N-limited *A.*  
75 *punctatus* produces an extracellular compound termed a hormogonium inducing factor (HIF) that  
76 induces synchronous differentiation of hormogonia (Campbell and Meeks, 1989) and, most  
77 likely, chemoattractants (Nilsson *et al.*, 2006). Once hormogonia have colonized slime cavities  
78 on the ventral surface of the gametophyte, further hormogonium differentiation is suppressed by  
79 a plant produced hormogonium repressing factor and the hormogonia return to the vegetative  
80 growth state (Cohen and Meeks, 1997). Under these conditions, infection is confined to the  
81 initial 2-3 days of coculture. Colonization of the slime cavity is followed by growth of associated  
82 *N. punctiforme*, concurrent heterocyst differentiation to a level that is about 3-fold higher than in  
83 the free-living state and a rate of nitrogen fixation that is more than 8-fold greater (Meeks, 1998,  
84 2003). The fixed nitrogen is released as ammonium to support growth of *A. punctatus* (Meeks *et*  
85 *al.*, 1985).

86 Molecular mechanisms of infection and organogenesis have been identified by genetic  
87 analyses and modeled in rhizobia-legume and actinobacteria-actinorhizal plants in the context of

88 a common symbiotic signaling pathway (CSSP), collectively with arbuscular mycorrhizal fungi  
89 and nearly all land plants (Horváth *et al.*, 2011; Harris *et al.*, 2020). Apart from a snapshot RNA-  
90 Seq experiment during the genome sequencing of the hornworts *A. punctatus* and two strains of  
91 *A. agrestis* (Li *et al.*, 2020), nothing is known of the genetics or genomics of N-starvation  
92 dependent infection by symbiotically competent *Nostoc* species of any plant association.

93 Since N-starvation is a prerequisite for endophytic symbiotic association in plants, we  
94 initiated a time course RNA-Seq analysis of *A. punctatus* gametophyte tissue incubated in the  
95 absence of combined N and absence or presence of *N. punctiforme*. We anticipate that the results  
96 will resolve the identity of differentially expressed genes (DEG) and possibly the metabolic  
97 pathways altered in symbiotically associated *A. punctatus* and provide experimental approaches  
98 to identify the controlling regulatory elements. How a hornwort responds to N-starvation and  
99 initiates symbiotic association can then be compared to other nitrogen-fixing symbioses and  
100 inform approaches to engineering similar symbioses in crop plants (Mus *et al.*, 2016; Oldroyd,  
101 2013; Pankievicz *et al.*, 2019).

102 Indeed, the results show that the presence of *N. punctiforme* does alter the patterns of DEG,  
103 relative to N-starvation of *A. punctatus* alone, by enhancing transcription of some genes that  
104 were downregulated or by repressing genes that were upregulated. Analysis of the temporal  
105 patterns of transcript accumulation indicates that complementation of about 42% of the DEG by  
106 *N. punctiforme* correlated with the onset of symbiotic N<sub>2</sub> fixation, while about 25% of the DEG  
107 were complemented during colonization of the symbiotic cavity before N<sub>2</sub> fixation had  
108 commenced.

## 109 **Materials and Methods**

### 110 **Plant and Cyanobacterium Growth Conditions**

111 Previously, surface-sterilized spores were germinated to obtain axenic gametophyte tissues of *A.*  
112 *punctatus* (Enderlin and Meeks, 1983). Hutner's minimal medium with NH<sub>4</sub>NO<sub>3</sub> as the nitrogen  
113 source (H+N) was used for the growth of *A. punctatus* (Enderlin and Meeks, 1983). The minimal  
114 medium was supplemented with 5 mM 2-(N-morpholino) ethanesulfonic acid (Mes: Sigma  
115 Chemical Co.) adjusted to pH 6.4 with NaOH as buffer and 0.5% (w/v) glucose, originally  
116 included to increase the growth rate of light-limited laboratory cultures. Gametophyte tissues

117 were incubated in 100 ml of medium in 300 ml Erlenmeyer flasks, at 20° C and 50 rpm orbital  
118 shaking, under 20-Watt fluorescent lamps (3.5-8.0 W m<sup>-2</sup>; cool-white) with 16 h and 8 h of the  
119 light-dark cycle. The stock cultures of symbiont-free *A. punctatus* were subcultured into H+N  
120 plus Mes and glucose every 14 days.

121 *N. punctiforme* was maintained under standard growth conditions (Enderlin and Meeks,  
122 1983). For experiments, the cultures were grown up to an early light-limited linear phase in the  
123 standard minimal salts medium diluted fourfold, with N<sub>2</sub> as the nitrogen source (Enderlin &  
124 Meeks, 1983). The cultures were incubated in 50 ml of medium in a 125 ml Erlenmeyer flask  
125 with orbital shaking at 120 rpm and 25° C under 19 to 46 W m<sup>-2</sup> s<sup>-1</sup> of cool white fluorescence  
126 lights. Chlorophyll *a* (Chl) content of *N. punctiforme* was determined after extraction in 90%  
127 methanol (Meeks and Castenholz, 1971).

128

### 129 ***A. punctatus*-*N. punctiforme* Symbiotic Reconstitution and Sampling**

130 Gametophyte tissues of *A. punctatus*, grown in H+N were washed with Hutner's medium lacking  
131 combined N (H-N) and transferred to two 100 ml of H-N medium, with Mes and glucose (in 300  
132 ml Erlenmeyer flasks). Approximately 10-12 g fresh weight (FW) of *A. punctatus* gametophytes  
133 (14 days after the last transfer) were added to each of the flasks, one was cocultured with 100-  
134 135 µg Chl *a* content of *N. punctiforme*, whereas the other flask was symbiont-free. The flasks  
135 were incubated under the growth conditions noted above. The gametophytes were sampled at day  
136 0 (before initiation of the N-starvation), and after 2, 5, 7, 10, 14, and 28 days of incubation. The  
137 whole experiment was replicated thrice, with a total of 39 samples.

138

### 139 **Acetylene Reduction Assay, Total Chl estimation, and Chl Fluorescence Measurements**

140 Nitrogenase activity was measured by the reduction of acetylene to ethylene. Approximately 100  
141 mg of tissue was sampled and washed using streams of distilled water to remove epiphytic  
142 attachment of *N. punctiforme* (as were all cocultured tissues prior to experimental analysis). The  
143 cleaned sample was incubated in 2 ml of H-N medium in a 7.5 ml glass vial sealed with a septum  
144 stopper. Acetylene was made freshly from calcium carbide (CaC<sub>2</sub>) and injected into each vial to

145 6% (vol/vol). The ethylene-acetylene content was monitored by gas chromatography after 30, 60,  
146 and 90 min of incubation. One hundred microliter of a sample from the vial atmosphere was  
147 injected onto a Porapak R column in a gas chromatograph equipped with a flame ionization  
148 detector (model 940, Varian Instrument Division, Walnut Creek, CA). The normalization and  
149 calculation of the rate of ethylene production using the excess acetylene as an internal standard  
150 (i.e., ratio of ethylene to acetylene equals amount of ethylene produced based on a standard  
151 curve) were performed according to Steinberg & Meeks (1991). The number of *N. punctiforme*  
152 colonies in cocultured gametophytes was determined under a stereomicroscope.

153 The total Chl *a* and Chl *b* content from N-starved cocultured and symbiont-free gametophytes  
154 was estimated after extraction of 100 mg (freshly ground sample in liquid nitrogen [LN]) of plant  
155 sample in 10 ml of 80% Acetone and quantified using the dichromatic equations of Inskeep &  
156 Bloom (1985).

157 Dark-adapted (20 min darkening) Chl fluorescence yield, ( $F_v/F_m$ ) was estimated with an  
158 imaging PAM fluorometer (PAM-2000, Walz, Effeltrich, Germany) with a saturating pulse  
159 ( $7000 \mu\text{mol m}^{-2} \text{s}^{-1}$  for 1 s) of blue light to measure the maximum dark-adapted fluorescence  
160 yield,  $F_m$ . The maximum and effective quantum yields of Photosystem II electron transport were  
161 calculated as  $F_v/F_m = (F_m - F_0) / F_m$ .

162 All the above-mentioned experiments were repeated thrice (biological replicates), and three  
163 technical replicates for each time point.

164

## 165 **Improved *A. punctatus* Genome Assembly and Annotation**

166 Following updates to the Oxford Nanopore's Guppy basecaller, the raw sequence data used to  
167 assemble the first iteration of the *A. punctatus* genome (Li *et al.*, 2020) was re-basecalled and  
168 assembled with Flye (Kolmogorov *et al.*, 2019). The draft assembly was polished with five  
169 iterations of Pilon (Walker *et al.*, 2014) using 100X coverage. A custom repeat library was  
170 created with EDTA (Ou *et al.*, 2019) and input into RepeatMasker (Smit *et al.*, 2015) to mask  
171 repetitive regions of the genome for gene annotation. Gene models were predicted with  
172 BRAKER2 (Brûna *et al.*, 2021) using RNA-seq data from one replicate of the Li *et al.* (2020)  
173 cyanobacterial symbiosis experiment, as well as their predicted proteins from *A. agrestis* as

174 training data. Gene functional annotations were obtained using eggNOG-mapper (Cantalapiedra  
175 *et al.*, 2021). Genome annotation completeness was measured using BUSCO v5 with the  
176 Viridiplantae odb10 reference dataset (Simão *et al.*, 2015).

177

## 178 **Plant RNA Extraction and RNA Sequencing Protocol**

179 The freshly sampled and washed gametophytes were ground in LN with a mortar and pestle and  
180 stored at -80° C. RNA was extracted from 100 mg of frozen tissue using the Spectrum total RNA  
181 plant kit (Sigma-Aldrich). The mRNA library was prepared by poly-A enrichment and paired-  
182 end sequencing was performed on Illumina NovaSeq6000 (2 × 150 bp) by Novogene  
183 (Sacramento, CA).

184

## 185 **RNA-Seq Data Set and Sequencing Analysis of *A. punctatus*-*N. punctiforme* Symbiosis**

186 All fastq files were quality-filtered and trimmed using fastp version 0.20.0 (Chen *et al.*, 2018b)  
187 and subsequently mapped to the reference genome using HISAT2 version 2.1.0 (Kim *et al.*,  
188 2015). All reads were 96.33% to 98.57% mapped to the genome. Transcript abundances were  
189 estimated using the updated *A. punctatus* genome annotation in Stringtie version 2.1.1 (Pertea *et*  
190 *al.*, 2015).

191 The median of ratios method of normalization was used to normalize all the gene counts,  
192 which were later used to plot graphs of different temporal gene expression patterns from selected  
193 clusters and a few other gene expression patterns from the transcriptome. The functional  
194 annotation file containing all KEGG and GO annotations for 69% of the transcripts from the  
195 gene count matrix are detailed in Supplemental Dataset S1. Variance stabilizing transformation  
196 (VST) normalized genes were fed into maSigPro (Conesa *et al.*, 2006) in R version 4.0.2 to  
197 analyze the changes in the temporal gene expression patterns. The significantly ( $P \leq 0.05$ ) DEG  
198 were subsequently clustered into nine different profiles as per their gene expression patterns  
199 using “hclust” in maSigPro.

200

## 201 **Statistical Analysis**



202 The results of cocultured or symbiont-free *A. punctatus* gametophytes in acetylene reduction  
203 assays, total Chl content, and  $F_v/F_m$  were tested using ANOVA followed by Tukey HSD test  
204 with the function `aov` and `tukeyhsd` which is a part of R core package `stats`, version 4.0.2  
205 (Yandell, 2017).

206

## 207 **Results and Discussion**

### 208 **Time Course of *N. punctiforme* Colonization of *A. punctatus*, Induction of Nitrogenase** 209 **Activity and Change in Chlorophyll Content in N-Starved Gametophyte Tissue**

210 The colonization of *N. punctiforme* within the slime cavities of *A. punctatus* gametophyte tissue  
211 is the third step of the infection process, following plant-dependent induction of hormogonium  
212 differentiation and chemoattraction of hormogonia. *N. punctiforme* colonies were routinely  
213 microscopically visible in gametophytes after 7 days of co-culture and only rarely observed  
214 earlier (Fig. 1A). The colonies were largely present at the tip of the gametophytes, near the  
215 marginal meristem. The color density of the day 7 colonies was relatively light, but it increased  
216 with time up to 14 days after coculture, reflecting growth of symbiotic *N. punctiforme* in the  
217 slime cavity. The space between the gametophyte margin and the colonies increased as the tissue  
218 also continued to grow (Fig. 1A), but no new infections, normalized to fresh weight (FW) of  
219 gametophyte tissue, were observed over the 28-day period. The reconstituted *A. punctatus*-*N.*  
220 *punctiforme* tissue retained its green color throughout the experimental time course. Conversely,  
221 when symbiont-free *A. punctatus* was N-starved, the gametophytes appeared pale green on day 2,  
222 then turned yellow to pale yellow as incubation time continued (Fig. 1B).

223 Nitrogenase activity was monitored by the acetylene reduction assay. Acetylene conversion to  
224 ethylene was observed within 5 days of coculture, before *N. punctiforme* colonies could routinely  
225 be microscopically observed in the tissue. The rate of acetylene reduction increased about 4-fold  
226 between at days 5 and 14, and then decreased to 12% of the maximal rate by day 28 ( $P < 0.001$ )  
227 (Fig. 1C). *N. punctiforme* does not form a stable and long-lasting association with *A. punctatus*  
228 and this is reflected, in part, by the decline in acetylene reduction 14 d after the initiation of  
229 coculture. We use *N. punctatus* as a model organism to examine the initial stages of symbiotic  
230 association because it is amenable to facile genetic manipulation (Cohen *et al.*, 1994; 1998), in

231 contrast to an original stable symbiotic isolate from *A. punctatus*, *Nostoc* sp. strain PCC 9305  
232 (syn strain UCD 7801). The rate of ethylene production from symbiotic gametophytes increased  
233 with time from 0.109 to 11.423 nmol min<sup>-1</sup> g FW<sup>-1</sup> (Fig. 1C). The day 14 rate is similar to that of  
234 *A. punctatus* colonized with *Nostoc* sp. strain PCC 9305 (Steinberg and Meeks, 1991).

235 Total Chl content of N-starved cocultured and symbiont-free *A. punctatus* was estimated by  
236 calculating the Chl *a* and Chl *b* content from gametophyte tissues. The total Chl content in  
237 symbiotic gametophytes varied between 5.23 to 3.3 µg per 10 mg FW, whereas the total Chl  
238 content declined from 5.23 to 0.79 µg per 10 mg FW in symbiont-free *A. punctatus* ( $P < 0.001$ )  
239 (Fig. 1D).

240

### 241 **Improved Genome Assembly and Annotation of *A. punctatus***

242 The new genome assembly increased in size slightly from 132.8 to 134.6 Mb and increased in  
243 contiguity substantially, as contig N50 doubled from 1.7 to 3.3 Mb. The number of predicted  
244 gene models from the new assembly decreased from 25,426 to 23,021 but there was a  
245 considerable increase from 85% to 92% complete genes identified by BUSCO (Dataset S1). Of  
246 all the predicted genes, 69% can be functionally annotated (Dataset S2). The gene location  
247 numbers are formally assigned as, for example: *Anthoceros\_punctatus\_v2\_contig1\_g00020*; on  
248 occasion, we refer to the location numbers in figures or text as, for examples, *contig1\_g00020* or  
249 *g00020*.

250

### 251 **Global RNA-Seq Analysis**

252 A two-component Principal Component Analysis (PCA) identified the variation in the biological  
253 replicates at each time point for each treatment. Overall, all the biological replicates are closely  
254 associated with each other. The exception is the three biological replicates at time 0, which are  
255 less tightly clustered (Fig. S1).

256

### 257 **Identification of Differentially Expressed Genes by Symbiotic and Symbiont-Free *A.*** 258 ***punctatus***

259 Analysis by maSigPro yielded 1,448 DEG of *A. punctatus* at a  $P < 0.05$  through the two six-point  
260 time courses without and with *N. punctiforme*, although the biochemical functions of only 1,210  
261 transcripts (84%) with annotations were predicted via GO and/or KEGG (Dataset S3). This 84%  
262 is markedly higher than the 69% of genes that were annotated in the genome (Dataset S2). The  
263 plots of both experimental lines include counts from the common time 0.

264 A user selected output of 9 clusters yielded multiple cluster patterns reflecting initial up- or  
265 downregulation of gene expression during the time course of N-starvation, persistence of the  
266 relative amount of transcript accumulation with time and a time dependence upon reaching the  
267 stable or final relative value of transcript accumulation. In the case of symbiont-free *A.*  
268 *punctatus*, six temporal patterns can be described (Fig. 2). **i)** Two clusters (1 and 6) in which  
269 genes whose transcript accumulation was upregulated to different levels and at different rates  
270 between times 0 and 5 d, and the level of transcripts remained at an elevated value, relative to  
271 time 0, for up to 28 days. **ii)** Two clusters (4 and 9) where transcripts were rapidly upregulated,  
272 followed, or not, by a slight delay before declining to approximately the time 0 value by day 28.  
273 **iii)** In cluster 8, which also represents the fewest genes, transcript accumulation was upregulated  
274 by day 5, remain elevated until day 10 before declining to the time 0 value by day 28. **iv)** Two  
275 clusters (3 and 7) in which transcripts rapidly declined to a lower constant level by days 2 to 5  
276 and then remained depressed through day 28. **v)** In cluster 5, transcripts rapidly declined by day  
277 2 and then slowly increased, approaching the time 0 level. **vi)** Transcripts in cluster 2 showed a  
278 slight delay in changes from the time 0 level before their accumulation slowly declined to a  
279 lower level.

280 When *A. punctatus* was cocultured with *N. punctiforme*, allowing for reconstitution of the  
281 symbiosis, there were two overarching groups displaying patterns of transcript accumulation. In  
282 the first group, clusters 4, 8 and 9 showed essentially the same patterns in the presence or  
283 absence of *N. punctiforme*. The shape of the plot of the cocultured *A. punctatus* in cluster 5  
284 appears similar to symbiotic tissue in clusters 3 and 7; the similarity comes from the sharp  
285 downregulation followed by a 5-day lag and then upregulation starting at day 7 before peaking at  
286 14 days of incubation. This appears to reflect a hybrid response because there was slow  
287 upregulation in the absence of *N. punctiforme* and the level of expression in both tissues  
288 approaches the time 0 value by day 28. Here, we will treat the transcriptional patterns in clusters

289 4, 5, 8 and 9 as influenced by, but not dependent on, *N. punctiforme*. Most interesting is the  
290 second group; relative to *A. punctatus* alone, the presence of *N. punctiforme* unequivocally  
291 repressed the N-starvation induced upregulation of transcript accumulation (clusters 1 and 6) and  
292 enhanced the transcription of genes that were downregulated in its absence (clusters 2, 3 and 7).  
293 However, there are temporal differences in the responses. For examples, in cluster 6, the  
294 repressive effect of *N. punctiforme* appears to be immediate, whereas in cluster 1 there was an  
295 immediate transcriptional upregulation followed by a short period of stable expression and then a  
296 first order decline to the time 0 level. In cluster 2, the cocultured tissue showed an immediate  
297 upregulation in transcripts, which remained elevated until at least day 10, before beginning a  
298 decline to slightly less than the time 0 value, while that in symbiont-free *A. punctatus* stayed  
299 constant through day 2 before slowly declining to a lower level. The transcriptional patterns in  
300 clusters 3 and 7 differ in the timing of the enhanced accumulation; the transcripts in cluster 3  
301 began to increase accumulation from the repressed level after 5 days of incubation, while in  
302 cluster 7 the increase started after day 10. In both cases, transcripts returned to at or near the time  
303 0 level, which may indicate return to a steady state.

304

### 305 **Functional Analysis of Differentially Expressed Genes**

306 The differentially expressed, annotated, transcripts were manually organized into the 10 major  
307 metabolic groupings shown in Fig. S2 to allow analysis of their expression patterns in the context  
308 of cellular growth and its regulation. The most highly represented genes are present in the  
309 unassigned function and core metabolism categories, which might be expected in global  
310 transcriptomic analysis of a growth stress response and where 56% of the DEG were  
311 immediately downregulated. With respect to its broad descriptive nature, the functional analysis  
312 is presented in Dataset S3 with a complete gene list, including normalized expression values and  
313 a guide to their interpretative navigation (Supplementary Guide S1). In the following section, we  
314 will focus on those DEG complemented by the presence of *N. punctiforme*, as well as some  
315 genes that were sorted as constitutively expressed but that can be predicted as relevant to N-  
316 starvation and symbiotic interactions.

317

## 318 **Genes Relevant to Nitrogen Starvation and Symbiotic Interaction.**

319 In the response of *A. punctatus* to N-starvation, based on multiple studies of algae and terrestrial  
320 plants, we hypothesize that managing the resulting excess photosynthetic reductant pool could  
321 occur by three different processes: **i)** decrease in the rate of photosynthetic reductant generation;  
322 **ii)** increases in the uptake of low levels of an existing source or acquisition of an alternative  
323 environmental source of combined N; or **iii)** utilization of an organic reductant sink whose  
324 metabolic product can be stored or excreted; or any combination of these. If any one of these  
325 three processes were to exclusively occur during N-starvation of *A. punctatus*, the result is  
326 predicted to be an initial up or down transcriptional-regulation of the genes encoding the  
327 essential proteins and would yield predictable temporal patterns and levels of transcript  
328 accumulation. Here, we have reconstituted the *A. punctatus*-*N. punctiforme* symbiotic association  
329 such that N<sub>2</sub>-derived ammonium would become the alternate environmental source of N. The  
330 time in which *N. punctiforme* becomes a functional N<sub>2</sub>-fixing symbiont after initiation of  
331 coculture was determined by whole tissue assays of acetylene reduction as a proxy of nitrogenase  
332 activity. The data in Fig. 1c indicates that *N. punctiforme* linearly attains a fully functional  
333 symbiotic state between shortly after the initiation of coculture at day 5 up to day 14; the  
334 nitrogenase specific activity is the same on day 14 as that of a long-term association between *A.*  
335 *punctatus* and its original symbiotic isolate, *Nostoc* sp. strain PCC 9305 (Steinberg and Meeks,  
336 1991). Thus, although *N. punctiforme* does not form a long-term symbiosis with *A. punctatus*, its  
337 N<sub>2</sub>-fixing physiology, by 14 days of association, is reflective of a long-term association.

338 In this context, we suggest that clusters 4, 5, 8 and 9, where the transcription patterns are not  
339 markedly influenced by the presence of *N. punctiforme*, reflect a general stress response that is  
340 separate from, but possibly instigated by, N-starvation response; these clusters represent 33% of  
341 the DEG. Our discussion below is largely, but not exclusively, guided by genes in clusters 1, 2,  
342 3, 6 and 7 in which the presence of *N. punctiforme* does alter the patterns of expression.  
343 Specifically, the temporal patterns in clusters 1, 3 and 7 strongly correlate with the analogous  
344 pattern of the onset of symbiotic nitrogenase activity and account for 42% of the DEG.  
345 Conversely, the temporal patterns in clusters 2 and 6 are initiated prior to, and appear  
346 independent of, symbiotic dinitrogen fixation; these clusters account for 25% of the DEG. We  
347 will also introduce some constitutively expressed genes encoding proteins that could be predicted

348 as involved in adaptation to these responses. In tracheophytes, gene products and isozymes are  
349 often localized in specific tissues and organs, which help to understand the physiological roles of  
350 gene family members. Those bryophytes that establish symbioses may also have tissue  
351 differentiated from the bulk gametophyte thallus, such as sporophytes, rhizoids and slime cavity  
352 cells, which, in the liverwort *Blasia pusilla*, elaborate septate, branched filaments of metabolite  
353 transfer cells that increase in profusion after *Nostoc* spp. colonization (Rodgers and Stewart,  
354 1977), and where isozymes could be localized.

355

### 356 **Genes Related to the Consequences of N-Starvation on Photoautotrophic Growth of *A.*** 357 ***punctatus* and Their Transcriptional Complementation by *N. punctiforme*.**

358 **Photosynthetic characteristics.** Fig. 1B depicts the visual degreening of symbiont-free  
359 gametophyte tissues in absence of combined N, which corresponds with the lowering of total Chl  
360 content in those tissues, as seen in other plants (Sayed, 1998). Nitrogen limitation in chloroplasts  
361 impairs the photosynthetic machinery, causing significant damage in the reaction centers of  
362 photosystem (PS) II, leading to a major reduction in  $F_v/F_m$  (Zhao *et al.*, 2017) (Fig. 1E). The  
363 maximum dark-adapted PS II quantum yield was estimated by in vivo Chl fluorescence ( $F_v/F_m$ ).  
364 A sustained  $F_v/F_m$  value, ranging from 0.729 to 0.819 was observed in symbiotic *A. punctatus*  
365 gametophytes. N-starvation reduced  $F_v/F_m$  of symbiont-free *A. punctatus* from 0.819 at day 0 to  
366 0.574 (stressed phase) by day 28 ( $P < 0.001$ ). It should be noted that a much lower stressed phase  
367 value than the 0.517 at day 28 has been reported in plants under different stress conditions  
368 (Murchie and Lawson, 2013). The latter comparison indicates photosynthesis was not completely  
369 switched off in symbiont-free *A. punctatus*, although visually the tissue looked compromised;  
370 this conclusion is supported by the continued transcription of genes in, for example clusters 1  
371 and 6 by day 28.

372 There are 33 DEG encoding proteins indirectly or directly related to photosynthesis (Dataset  
373 S3). Sixty percent of the chloroplast and photosynthetic transcripts are present in cluster 3 in  
374 which they were initially downregulated and then upregulated in the presence of *N. punctiforme*  
375 in a temporal pattern corresponding the production of  $N_2$ -derived ammonium. Examples of  
376 transcripts encoding one of ten related or homologous proteins in a LHC (LHCA2-2, associated

377 with PS I); a PS II reaction center protein (PSBW, which stabilizes macromolecular complexes)  
378 and one of two oxygen-evolving enhancer proteins (PSBP, which are also required for PS II core  
379 stability); a PS I reaction center protein (PSAD, probable ferredoxin docking protein); and the  
380 RuBisCO small subunit are shown in Fig. 3A-E. The transcription of these core photosynthetic  
381 genes was rapidly downregulated and appears to be uncoupled from the slower decline in total  
382 Chl content and even slower decline in PS II quantum yield. Some of these internal differences  
383 might be due to the relatively low light intensity (ca.  $65 \mu\text{mol m}^{-2} \text{s}^{-1}$ ) used during culture, which  
384 could slow bleaching and photooxidation. This suggestion is supported, in part, by the  
385 observation that a gene encoding a protein involved in xanthophyll metabolism is present in  
386 cluster 7 where it showed rapid downregulation in symbiont-free and symbiotic tissues and was  
387 subsequently upregulated in symbiotic tissue between days 14 and 28 to the approximately the  
388 time 0 level (Fig. 3F). This pattern implies a degree of N-starvation response, although it is the  
389 reverse of that anticipated in protection from a highly reduced photosynthetic electron transport  
390 system. Xanthophylls are present in association with Chls in the LHCs where they operate in a  
391 cycle of oxidation and reduction to quench excitation generated by high light intensities (Niyogi  
392 *et al.*, 1997; Latowski *et al.*, 2011). Genes encoding core components of the PS reaction centers  
393 and of electron transport chains, as well as the large subunit of RuBisCo, could also be  
394 differentially transcribed, but they are localized in the plastid genome and their transcription  
395 proposed to be subject to redox control (Allen, 2015); thus, we did not sequence them due to the  
396 lack of poly-A extensions.

397 We conclude that a major physiological and transcriptional response to N-starvation by *A.*  
398 *punctatus* was to lower the photosynthetic potential, largely by destabilizing the PS II reaction  
399 center complex and limiting electron transfer out of the PS I complex. The lowered potential was  
400 subsequently complemented by symbiotic association with  $\text{N}_2$ -fixing *N. punctiforme*.

401 **N acquisition and assimilation.** The genes encoding N acquisition and assimilation in *A.*  
402 *punctatus* occur in multigene families; they are summarized in Supplementary Table S1. Some  
403 N-starved plants induce the transcription of transport systems for ammonium or nitrate/nitrite  
404 (Krapp *et al.*, 2011; Calabrese *et al.*, 2017). The *A. punctatus* genome contains 7 genes annotated  
405 as ammonium transporters (AMT). Redundancy in AMT genes is common in land plants, (Loqué  
406 and von Wirén, 2004; Couturier *et al.*, 2007). The genes have distinct phylogenies that can be

407 subdivided into subfamilies and clades, and the proteins are distributed amongst various tissues  
408 and organelles. The bryophyte liverwort *Marchantia polymorpha*, has 5 AMTs in the AMT1  
409 clade (McDonald and Ward, 2016). Only two of the *A. punctatus* AMT genes can be assigned  
410 biologically significant roles in ammonium transport: differentially transcribed g54810 encoding  
411 an AMT1;5 and g162610 encoding a constitutively expressed AMT2;1 (Table S1). The  
412 transcriptional pattern of g54810 is of cluster 1 showing upregulation in *A. punctatus* early in N-  
413 starvation, the transcription level remained high in the absence, but slowly declined in the  
414 presence, of *N. punctiforme* (Fig. 4A). This temporal pattern is consistent with a search for  
415 exogenous ammonium, realized when N<sub>2</sub>-derived ammonium became available.

416 There are 2 genes encoding nitrate transporters in the NTR2.2 family (g128250 and g119600);  
417 both were highly expressed and sorted as constitutively transcribed (Table S1). However, on  
418 inspection, both were differentially expressed in the pattern of cluster 1 (Fig. 4B). We have no  
419 facile explanation of why the algorithm did not sort these as DEGs. Nevertheless, g128250  
420 encodes a protein with a putative signal peptide, but no transmembrane domains in the  
421 designated transport domain, thus, its actual function is not clear. The g11960 transcriptional  
422 pattern is similar AMT1;5 and consistent with a search for combined N before complementation  
423 by nitrogenase activity. The genome also contains 34 genes encoding proteins of the low or  
424 variable affinity nitrate transporters in the NTR1.1 PTR family (Sun and Zheng, 2015), now  
425 referred to as NPF (Wang *et al.*, 2018). Due to the uncertainty of their contribution to nitrate  
426 transport, this family was not thoroughly analyzed. All genes were transcribed to varying degrees  
427 ranging from 2 to 25,000 normalized counts. Four of the genes are in the differential  
428 transcriptome and present in clusters 2 (2 genes), 6 and 7. The gene in cluster 6 shows early  
429 upregulation in the absence of *N. punctiforme* and its upregulation was repressed in symbiotic  
430 tissue before provision of N<sub>2</sub>-derived ammonium (Fig. 4C).

431 It has been documented plants can use a variety of exogenous amino acids and even proteins  
432 as N sources for growth (Miller *et al.*, 2008; Paungfoo-Lonhienne *et al.*, 2008; Mertz *et al.*,  
433 2019). Amino acid and other organic N transporters were present in the differential  
434 transcriptome; the transporters with the highest levels of expression are for lysine and histidine  
435 and they are present in cluster 7 (Dataset S3), which is inconsistent with N-limited  
436 complementation function. It remains possible that the presence of exogenous amino acids that,



437 when coupled with N-starvation, could induce the transcription of their respective transporters,  
438 but we have no evidence for such a possibility. Taken together, we conclude that a search for  
439 alternative inorganic N sources, such as ammonium and nitrate, is supported by the data  
440 presented.

441 In general, N-starvation also induces upregulation of N signaling and assimilatory proteins.  
442 Symbiotic *A. punctatus* assimilates exogenous and N<sub>2</sub>-derived ammonium by the glutamine  
443 synthetase (GS) and glutamate synthase (GOGAT, an acronym for glutamine: 2-oxo-glutarate  
444 amido transferase) pathway (Meeks *et al.*, 1983, 1985). The GLB1 nuclear gene encodes the N  
445 regulatory protein PII, which is localized in chloroplasts. PII can be reversibly modified by  
446 uridylylation and deuridylylation and the different forms modulate both transcription and  
447 catalytic activity of target proteins, such as GS. In *A. thaliana*, GLB1 is transcriptionally  
448 upregulated by light and sucrose; it is downregulated in the dark and the presence of asparagine,  
449 glutamine, and glutamate (Hsieh *et al.*, 1998). Conversely, in the green alga *Chlamydomonas*  
450 *reinhardtii*, GLB1 is upregulated in the absence of ammonium (Zalutskaya *et al.*, 2018). A single  
451 *A. punctatus* GLB1 gene encodes PII. GLB1 is rapidly upregulated during N-starvation with  
452 stable accumulation prior to declining after day 10 in the absence and presence of *N. punctiforme*  
453 (Fig. 4D); this pattern could reflect a modest amount of upregulation. However, the fact that the  
454 temporal DEG pattern of GLB1 transcription was not complemented by N<sub>2</sub>-derived ammonium  
455 implies that PII may be involved in more than N stress (Chellamuthu *et al.*, 2013).

456 In bacteria and some plants, limitation for ammonium results in upregulation of GS activity  
457 and synthesis, both as signaled by the covalently modified PII protein. In algae and plants, there  
458 are two forms of GS proteins; GS1, is localized in the cytosol and isoforms of it are distributed  
459 in various tissues and organs, whereas GS2 is targeted to the plastids. The plastid protein is  
460 typically encoded by a single nuclear gene, while 3 to 5 genes encode the GS1 isoforms  
461 (Swarbreck *et al.*, 2011). Eight genes are annotated as members of the GS (*glnA*) superfamily in  
462 *A. punctatus* (Table S1). The two primary GS genes are g158060 encoding a GS2 type of protein  
463 with a signal peptide (Fig. 4E), while constitutive expressed g162610 encodes a GS1 type protein  
464 with no signal peptide and a defined cytosolic domain (Fig. 4F). It is of interest that three other  
465 constitutively transcribed genes encode named GS proteins with signal peptides g141120 and  
466 g45770 plus g103610 which is a fusion protein with a different catalytic domain (Table S1).

467 Differentially expressed g158060, encoding GS2, is represented in cluster 3 where its transcripts  
468 initially declined in symbiont-free and symbiotic *A. punctatus* before they increased to a  
469 maximum by 10 d of incubation in symbiotic tissue and then again declined (Fig 4E). The  
470 pattern implies decreased transcription was in response to the absence of combined N and the  
471 subsequent increased transcription was in response to the presence of N<sub>2</sub>-derived ammonium.  
472 Based on the expression levels, GS1;1 would appear to be the dominant GS assimilatory protein  
473 in the entirety of the gametophyte tissue. It is not clear whether the GS2 protein is localized in  
474 chloroplasts in the bulk of gametophyte tissue, potentially at a lower concentration than GS1;1,  
475 or primarily in the slime cavity colonized by *N. punctiforme* as these are the first cells to  
476 encounter N<sub>2</sub>-derived ammonium. The post-translational modification status of any of the GS  
477 proteins in *A. punctatus* is unknown.

478 GOGAT proteins are localized to the plastids in plants (Suzuki and Knaff, 2005). There are  
479 two genes each annotated as encoding ferredoxin (Fd) (GLSF or GLU1) and NADH (GLTB)  
480 dependent GOGAT proteins in the *A. punctatus* genome (Table S1). The Fd-GOGAT encoding  
481 genes (g70690 and g70700) are present in tandem in the genome and are constitutively  
482 expressed. However, g70700 encodes a 329 amino acid peptide with only a GATase motif and a  
483 signal peptide; whether this peptide is a subunit of a holoenzyme with the g70690 protein is not  
484 clear. The g70690 gene is the most highly expressed (Fig. 4H) and most likely encodes the  
485 primary GOGAT activity in the gametophyte thallus. The gene g63560 encodes a NADH-  
486 GOGAT that consists of the core GLU1 catalytic domains, plus a mannosyltransferase domain  
487 and a pyridine nucleotide disulfide oxidoreductase domain in the N-terminal and C-terminal  
488 regions, respectively. This NADH-GOGAT was constitutively transcribed at an approximate 2.5-  
489 fold lower level than the g70690 encoded Fd-GOGAT (Fig. 4G). The g206190 encoded NADH-  
490 GOGAT was not expressed. Thus, there are one each Fd- and NADH-dependent GOGAT  
491 proteins constitutively present in *A. punctatus* under our experimental conditions. In  
492 tracheophytes, enhanced transcription of GOGAT encoding genes is tissue specific in response  
493 to photosynthate and N metabolites (Suzuki and Knaff, 2005) The genes encoding Fd-GOGAT  
494 are upregulated by light (especially red), sucrose, nitrate, ammonium, and other substrates and  
495 products of the GS-GOGAT pathway; conversely the NADH-GOGAT encoding genes appears  
496 to be primarily under nitrate and ammonium control with the most robust expression in roots.  
497 (Suzuki and Knaff, 2005).

498 Collectively, these data provide support for N-control over key enzymes of N-assimilation;  
499 specifically ammonium and nitrate transport, and a plastid GS2 plus a moderately expressed  
500 constitutive nodGS (encoded by *g14110*) with a signal peptide that implies  
501 compartmentalization. Moreover, they illustrate that the complexity of N-assimilation in  
502 bryophytes is like that in seed plants.

503 **Potential sinks for excess reductant accumulation.** Candidates for organic end products that  
504 function as internally stored or excreted reductant sinks during N-starvation include products  
505 such as polysaccharides, fatty acids and lipids, and secondary metabolites. We predict expression  
506 patterns for such sinks should follow those shown in cluster 1, where transient upregulation of  
507 gene expression was complemented in correlation with the onset of symbiotic N<sub>2</sub> fixation.

508 Since the symbiotic cavity in gametophyte tissue contains considerable slime, secretory  
509 polysaccharide synthesis must happen, and upregulation of the pathway would be a relatively  
510 benign solution to the consequences of N-starvation. Neither the composition nor the  
511 biosynthetic pathway of cavity slime is not known; nevertheless, the differential transcription  
512 patterns of the glycosyltransferases in *A. punctatus* are not consistent with a role in increased  
513 slime production (an example is shown in Fig. 5A). Triacylglycerol (TAG) and lipid  
514 accumulation are well documented in microalgae during N-starvation (Goncalves *et al.*, 2016) as  
515 well as in seeds of certain plants, such as castor bean (Chen *et al.*, 2018a). The genome contains  
516 14 genes encoding acyl carrier proteins involved in both fatty acid and TAG synthesis; one,  
517 identified as encoding Kas1, is present in the differential transcriptome in cluster 3; two were  
518 constitutively transcribed and the remainder were not expressed. Relative to other plants and  
519 algae, fatty acid, TAG and lipid accumulation do not appear to be robust during N-starvation of  
520 *A. punctatus*. These possibilities will need to be addressed biochemically.

521 Genes encoding cytochrome P450 (CYP450) were abundant in the differential transcriptome  
522 and highly represented in clusters 1 and 6. Only those in cluster 1 would be consistent with a  
523 transient N-starvation response complemented by N<sub>2</sub>-derived ammonium. CYP450 is a  
524 monooxygenase whose activities are involved in numerous metabolic pathways, especially those  
525 leading to stress adaptation, development, and synthesis of secondary metabolites (Xu *et al.*,  
526 2015). An example of the temporal expression pattern of one CYP450 is presented in Fig. 5B,  
527 where it shows initial upregulation in the absence and presence of *N. punctiforme*. The

528 observation that the presence of *N. punctiforme* negated the upregulation, in a pattern  
529 approximating that of induction of symbiotic nitrogenase activity, is consistent with an enzyme  
530 that is specific for N-stress in synthesis of an electron sink. It should be noted that at relatively  
531 larger number of CYP450 encoding genes are also differentially transcribed in the pattern of  
532 cluster 6 (e.g. g57450), where the presence of *N. punctiforme* repressed transcription before  
533 nitrogenase activity had been induced (Dataset S3). These results indicate that specific CYP450  
534 proteins are highly present under N-stress. Terpenes are a fundamental substrate for synthesis of  
535 a variety of stable and volatile secondary plant products that could well function as electron  
536 sinks. Moreover, the products are synthesized following a variety of abiotic and biotic stresses  
537 (Chatterjee *et al.*, 2017; 2018; 2020). One example of the differential expression of a terpene  
538 synthase from cluster 6 is shown in Fig. 5C; the presence of *N. punctiforme* completely  
539 suppressed upregulation of transcription from the marginal time zero level. Glycosylation is also  
540 involved in the biosynthesis and storage of secondary compounds. In plants, these reactions are  
541 controlled by a specific subclass of the ubiquitous glycosyltransferase family (Tiwari *et al.*,  
542 2016). The upregulated transcription pattern in symbiont-free *A. punctatus* is consistent with a  
543 role of glycosylation under N-starvation, whereas cocultured *A. punctatus* ameliorated the stress  
544 response (Fig. 4F). However, we provide no evidence for the substrate of this  
545 glycosyltransferase.

546

## 547 **Genes Related to Symbiotic Interactions**

548 Based on morphological, physiological and biochemical data, we previously suggested that the  
549 signaling between hornwort and cyanobacterium is primarily unidirectional from plant to  
550 symbiont, excluding transfer of N<sub>2</sub>-derived ammonium (Meeks, 1998). The temporal patterns of  
551 the diametrically opposite clusters 2 and 6 contradict that suggestion. The upregulation of DEGs  
552 in cluster 2 and their downregulation in cluster 6 were apparent by day 2 of coculture, during  
553 which time *N. punctiforme* hormogonia were colonizing the slime cavity, prior to the provision  
554 of fixed N, which was argued to contribute to the temporal patterns in clusters 1, 3 and 7. We do  
555 not yet know whether the early signaling is chemical or physical contact but have experiments to  
556 clarify this in progress using existing *N. punctiforme* mutants that differentiate hormogonia  
557 which are unable to infect gametophyte tissue and mutants that are infective but unable to fix N<sub>2</sub>.

558 A central question regarding the hornwort-cyanobacteria N<sub>2</sub>-fixing symbiosis is whether  
559 proteins constituting the plant CSSP are involved in establishment of the association. Nine genes  
560 encoding proteins of the CSSP (Oldroyd, 2013; Sellstedt and Richau, 2013; Debellé, 2020;  
561 Delaux and Schornack, 2021) were reported present in the *A. punctatus* genome (Li *et al.*, 2020).  
562 We found none of those genes in our differentially expressed transcriptome. We searched the  
563 transcriptome (Dataset S1) to determine if they were constitutively transcribed. This led to the  
564 detection of the nine CSSP encoding genes (Fig. 5A-J): Castor (calcium channel), Cyclops  
565 (calcium calmodulin-dependent binding to CCamK), STR1 (ABC transporter), STR2 (ABC  
566 transporter), SymRK (receptor-mediated signaling), CCamK (calcium and calmodulin-dependent  
567 serine/threonine protein kinase), Vapyrin (protein kinase), RAD1 (GRAS family transcription  
568 factor [TF]) and one copy of RAM1 (GRAS family TF) were expressed (Fig. 6A-I). RAM1  
569 displays a temporal pattern of cluster 1 but was not sorted as differentially expressed. RAD1 was  
570 expressed at a relatively low level, and a second copy of RAM1 was not expressed. A LysM  
571 receptor kinase is involved in perception of nodulation factors (Buendia *et al.*, 2018) and a gene  
572 putatively encoding such a protein was present in the transcriptome at a substantially high  
573 expressed level (Fig. 5J). These results indicate that the sensing and immediate signaling  
574 capacities of the CSSP are present in gametophyte tissue to recognize a compatible symbiont,  
575 which may or may not be *Nostoc* spp. Since hornworts do form mycorrhizal associations (Desirò  
576 *et al.*, 2013), we suggest the CSSP in *A. punctatus* may be restricted to its originally evolved role  
577 (Oldroyd, 2013). This is consistent with our previous suggestion that each group of symbiotic  
578 land plant partners of N<sub>2</sub>-fixing cyanobacteria (overwhelmingly *Nostoc* spp.) evolved different  
579 mechanisms to achieve control over the same metabolic processes in the cyanobacterium while  
580 arriving at a stable, competitive symbiotic association (Meeks, 1998). Nevertheless, because the  
581 genes are constitutively transcribed at a high level, involvement of the CSSP in cyanobacterial  
582 symbiosis with hornworts needs to be studied by mutational analysis, which is now being  
583 developed in *A. agrestis* (Frangedakis *et al.*, 2021).

584 Transcription of the gene for a sugar transporter (SWEET) in *A. punctatus* was previously  
585 identified as specifically upregulated in the presence of *N. punctiforme* (Li *et al.*, 2020) and  
586 verified here (Fig. 6K). What extends the prior observation is the fact that the activation of  
587 transcription of SWEET occurred early in the presence of *N. punctiforme*, prior to its provision  
588 of N<sub>2</sub>-derived ammonium, implying transcription may not initially be N-starvation dependent.

589 The implication of *N. punctiforme* dependent upregulation was the hypothesis that *A. punctatus*  
590 has a role in providing sugars, such as sucrose, fructose and glucose that are known to support  
591 symbiotic N<sub>2</sub>-fixation by *Nostoc* spp. in association with *A. punctatus* (Steinberg and Meeks,  
592 1991). In addition, we have observed a dependence on a *N. punctiforme* glucose permease for  
593 development of a functional symbiotic association (Ekman *et al.*, 2013).

594 To summarize, with our much-improved genome assembly and detailed temporal RNA-seq  
595 experiments, we found evidence of bidirectional communications between the partners and, for  
596 the first time, revealed how symbiotic cyanobacteria impact plant hosts' global gene expression  
597 through time. We also extend to hornworts knowledge of the complexity of N acquisition and  
598 assimilation. With the recent development of a hornwort transformation system, it is becoming  
599 feasible to carry out gene functional studies. We anticipate the candidate genes, and their  
600 putative functions, uncovered here will form the necessary foundation for future investigations  
601 into the genetics of cyanobacteria symbiosis.

602

### 603 **Supplementary Data**

604 **Supplementary Guide S1:** Guide to analysis of functional assignments of differentially  
605 expressed genes.

606 **Supplementary Figure 1.** PCA analysis of biological replicates.

607 Control (T0), cocultured (T2IN, T5IN, T7IN, T10IN, T14IN and T28IN) and symbiont-free  
608 (T2UN, T5UN, T7UN, T10UN, T14UN and T28UN) *A. punctatus* under N-starved conditions  
609 during time course RNA-Seq analysis.

610 **Supplementary Figure 2.** Manually assigned metabolic categories of differentially transcribed  
611 genes observed in cluster analysis.

612 **Supplementary Table 1.** Length, expression and domain organization of multiple gene families  
613 involved in N acquisition and assimilation.

614 **Supplementary Dataset S1.** Gene count matrix containing all the transcript counts of 23,021  
615 genes from 39 samples.

616 **Supplementary Dataset S2.** The functional annotation file containing all KEGG and GO  
617 annotations for 69% of the transcripts from gene count matrix.

618 **Supplementary Dataset S3.** The list of 1,210 significantly differentially expressed genes as an  
619 output from the cluster analysis, as well as the clustered distribution of each gene and its  
620 classification into ten major metabolic categories.

621

## 622 **Acknowledgements**

623 This research was supported by the USA National Science Foundation grant no. DEB1831552 to  
624 JCM and DEB1831428 to FWL. We thank Steven M. Theg and Matthew Edmund Gilbert for  
625 loan of the PAM fluorometer and Miguel A. Valderrama Gomez for assistance in computational  
626 analyses. We thank Janet Sprent for the inspiration of “*Nostoc* talks back”.

627

## 628 **Author contribution**

629 PC and JCM: design of the research; PC: performance of the research; PC, FWL, PS: data  
630 analysis; PC, JCM: interpretation; PC and JCM: writing the manuscript, with input from FWL  
631 and PS.

632

633 *Conflict of interest statement.* The authors declare no conflict of interest.

634

## 635 **Data availability**

636 All primary data for the RNA sequencing are deposited at SRA NCBI Genbank with accession  
637 no. PRJNA750572

## **References**

**Adams DG. 2002.** Cyanobacteria in symbiosis with hornworts and liverworts. In *Cyanobacteria in symbiosis* (pp. 117-135). Springer, Dordrecht.

**Brůna T, Hoff KJ, Lomsadze A, Stanke M, Borodovsky M.** 2021. BRAKER2: automatic eukaryotic genome annotation with GeneMark-EP+ and AUGUSTUS supported by a protein database. *NAR Genomics and Bioinformatics* **3**.

**Buendia L, Girardin A, Wang T, Cottret L, Lefebvre B.** 2018. LysM receptor-like kinase and LysM receptor-like protein families: an update on phylogeny and functional characterization. *Frontiers in Plant Science*. **9**, 1531.

**Calabrese S, Kohler A, Niehl A, Veneault-Fourrey C, Boller T, Courty P-E.** 2017. Transcriptome analysis of the *Populus trichocarpa*–*Rhizophagus irregularis* Mycorrhizal Symbiosis: Regulation of plant and fungal transportomes under nitrogen starvation. *Plant and Cell Physiology* **58**, 1003–1017.

**Campbell EL, Meeks JC.** 1989. Characteristics of hormogonia formation by symbiotic *Nostoc* spp. in response to the presence of *Anthoceros punctatus* or its extracellular products. *Applied and Environmental Microbiology* **55**, 125–131.

**Cantalapiedra CP, Hernández-Plaza A, Letunic I, Bork P, Huerta-Cepas J.** 2021. eggNOG-mapper v2: Functional annotation, orthology assignments, and domain prediction at the metagenomic scale. *BioRxiv*, 2021.06.03.446934.

**Chatterjee P, Kanagendran A, Samaddar S, Pazouki L, Sa TM, Niinemets Ü.** 2020. Influence of *Brevibacterium linens* RS16 on foliage photosynthetic and volatile emission characteristics upon heat stress in *Eucalyptus grandis*. *Science of The Total Environment* **700**, 134453.

**Chatterjee P, Kanagendran A, Samaddar S, Pazouki L, Sa TM, Niinemets Ü.** 2018. Inoculation of *Brevibacterium linens* RS16 in *Oryza sativa* genotypes enhanced salinity resistance: impacts on photosynthetic traits and foliar volatile emissions. *Science of the Total Environment* **645**, 721-732.

**Chatterjee P, Samaddar S, Anandham R, Kang Y, Kim K, Selvakumar G, Sa T.** 2017. Beneficial soil bacterium *Pseudomonas frederiksbergensis* OS261 augments salt tolerance and promotes red pepper plant growth. *Frontiers in plant science*, **8**, 705.

**Chellamuthu VR, Alva V, Forchhammer K.** 2013. From cyanobacteria to plants: conservation of PII functions during plastid evolution. *Planta* **237**, 451–462.

**Chen Y, Cen K, Lu Y, Zhang S, Shang Y, Wang C.** 2018a. Nitrogen-starvation triggers cellular accumulation of triacylglycerol in *Metarhizium robertsii*. *Fungal Biology* **122**, 410–419.

**Chen S, Zhou Y, Chen Y, Gu J.** 2018b. fastp: an ultra-fast all-in-one FASTQ preprocessor. *Bioinformatics* **34**, i884–i890.

**Cohen MF, Wallis JG, Campbell EL, Meeks JC.** 1994. Transposon mutagenesis of *Nostoc* sp. strain ATCC 29133, a filamentous cyanobacterium with multiple cellular differentiation alternatives. *Microbiology* **140**, 3233-3240.



**Cohen MF, Meeks JC.** 1997. A hormogonium regulating locus, *hrmUA*, of the cyanobacterium *Nostoc punctiforme* strain ATCC 29133 and its response to an extract of a symbiotic plant partner *Anthoceros punctatus*. *Molecular plant-microbe interactions: MPMI* **10**, 280–289.

**Cohen MF, Meeks JC, Cai YA, Wolk CP.** 1998. Transposon mutagenesis of heterocyst-forming filamentous cyanobacteria. *Methods in Enzymology*. Academic Press, 3–17.

**Conesa A, Nueda MJ, Ferrer A, Talón M.** 2006. *maSigPro*: a method to identify significantly differential expression profiles in time-course microarray experiments. *Bioinformatics* **22**, 1096–1102.

**Couturier J, Montanini B, Martin F, Brun A, Blaudez D, Chalot M.** 2007. The expanded family of ammonium transporters in the perennial poplar plant. *The New Phytologist* **174**, 137–150.

**Crawford NM, Glass ADM.** 1998. Molecular and physiological aspects of nitrate uptake in plants. *Trends in Plant Science* **3**, 389–395.

**Debellé F.** 2020. The common symbiotic signaling pathway. The model legume *Medicago truncatula*. John Wiley & Sons, Ltd, 523–528.

**Delaux P-M, Schornack S.** 2021. Plant evolution driven by interactions with symbiotic and pathogenic microbes. *Science* **371**.

**Desirò A, Duckett JG, Pressel S, Villarreal JC, Bidartondo MI.** 2013. Fungal symbioses in hornworts: a chequered history. *Proceedings Of The Royal Society B: Biological Sciences* **280**, 20130207.

**Ekman M, Picossi S, Campbell EL, Meeks JC, Flores E.** 2013. A *Nostoc punctiforme* sugar transporter necessary to establish a Cyanobacterium-Plant symbiosis. *Plant Physiology* **161**, 1984–1992.

**Enderlin CS, Meeks JC.** 1983. Pure culture and reconstitution of the *Anthoceros-Nostoc* symbiotic association. *Planta* **158**, 157–165.

**Feller U, Anders I, Mae T.** 2008. Rubiscolytics: fate of Rubisco after its enzymatic function in a cell is terminated. *Journal of Experimental Botany* **59**, 1615–1624.

**Frangedakis E, Waller M, Nishiyama T, et al.** 2021. An *Agrobacterium*-mediated stable transformation technique for the hornwort model *Anthoceros agrestis*. *New Phytologist*

**Ghodhbane-Gtari F, Hurst SG, Oshone R, Morris K, Abebe-Akele F, Thomas WK, Ktari A, Salem K, Gtari M, Tisa LS.** 2014. Draft Genome Sequence of *Frankia* sp. Strain BMG5.23, a Salt-Tolerant nitrogen-fixing Actinobacterium isolated from the root nodules of *Casuarina glauca* grown in Tunisia. *Genome Announcements* **2**.

**Glass ADM.** 2002. The regulation of nitrate and ammonium transport systems in plants. *Journal of Experimental Botany* **53**, 855–864.

**Goncalves EC, Wilkie AC, Kirst M, Rathinasabapathi B.** 2016. Metabolic regulation of triacylglycerol accumulation in the green algae: identification of potential targets for engineering to improve oil yield. *Plant Biotechnology Journal* **14**, 1649–1660.

**Guo J, Jia Y, Chen H, Zhang L, Yang J, Zhang J, Hu X, Ye X, Li Y, Zhou Y.** 2019. Growth, photosynthesis, and nutrient uptake in wheat are affected by differences in nitrogen levels and forms and potassium supply. *Scientific Reports* **9**, 1248.

**Harris JM, Pawlowski K, Mathesius U.** 2020. Editorial: Evolution of Signaling in Plant Symbioses. *Frontiers in Plant Science* **11**, 456.

**Horváth B, Yeun LH, Domonkos Á, et al.** 2011. *Medicago truncatula* IPD3 is a member of the common symbiotic signaling pathway required for Rhizobial and Mycorrhizal symbioses. *Molecular Plant-Microbe Interactions* **24**, 1345–1358.

**Hsieh MH, Lam HM, Van De Loo FJ, Coruzzi G.** 1998. A PII-like protein in *Arabidopsis*: putative role in nitrogen sensing. *Proceedings of the National Academy of Sciences* **95**, 13965–13970.

**Hsieh P-H, Kan C-C, Wu H-Y, Yang H-C, Hsieh M-H.** 2018. Early molecular events associated with nitrogen deficiency in rice seedling roots. *Scientific Reports* **8**, 12207.

**Inskeep WP, Bloom PR.** 1985. Extinction coefficients of chlorophyll *a* and *b* in *N,N*-Dimethylformamide and 80% Acetone. *Plant Physiology* **77**, 483–485.

**Kim D, Langmead B, Salzberg SL.** 2015. HISAT: a fast spliced aligner with low memory requirements. *Nature methods* **12**, 357–360.

**Kolmogorov M, Yuan J, Lin Y, Pevzner PA.** 2019. Assembly of long, error-prone reads using repeat graphs. *Nature Biotechnology* **37**, 540–546.

**Krapp A, Berthomé R, Orsel M, Mercey-Boutet S, Yu A, Castaings L, Elftieh S, Major H, Renou J-P, Daniel-Vedele F.** 2011. *Arabidopsis* roots and shoots show distinct temporal adaptation patterns toward nitrogen starvation. *Plant Physiology* **157**, 1255–1282.

**Latowski D, Kuczyńska P, Strzałka K.** 2011. Xanthophyll cycle--a mechanism protecting plants against oxidative stress. *Redox Report: Communications in Free Radical Research* **16**, 78–90.

**Li F-W, Nishiyama T, Waller M, et al.** 2020. *Anthoceros* genomes illuminate the origin of land plants and the unique biology of hornworts. *Nature Plants* **6**, 259–272.

**Liu W, Sun Q, Wang K, Du Q, Li W-X.** 2017. Nitrogen limitation adaptation (NLA) is involved in source-to-sink remobilization of nitrate by mediating the degradation of NRT1.7 in *Arabidopsis*. *New Phytologist* **214**, 734–744.

**Logan BA, Demmig-Adams B, Rosenstiel TN, Adams III WW. 1999.** Effect of nitrogen limitation on foliar antioxidants in relationship to other metabolic characteristics. *Planta*, **209(2)**, pp.213-220.

**Loqué D, von Wirén N. 2004.** Regulatory levels for the transport of ammonium in plant roots. *Journal of Experimental Botany* **55**, 1293–1305.

**de Marsac NT. 1994.** Differentiation of hormogonia and relationships with other biological processes. In: Bryant DA, ed. *Advances in Photosynthesis. The Molecular Biology of Cyanobacteria*. Dordrecht: Springer Netherlands, 825–842.

**McDonald TR, Ward JM. 2016.** Evolution of electrogenic ammonium transporters (AMTs). *Frontiers in Plant Science* **7**, 352.

**Meeks JC. 1998.** Symbiosis between nitrogen-fixing cyanobacteria and plants. *BioScience* **48**, 266–276.

**Meeks JC, Castenholz RW. 1971.** Growth and photosynthesis in an extreme thermophile, *Synechococcus lividus* (Cyanophyta). *Archiv für Mikrobiologie* **78**, 25–41.

**Meeks JC, Enderlin CS, Joseph CM, Chapman JS, Lollar MWL. 1985.** Fixation of  $[^{13}\text{N}]\text{N}_2$  and transfer of fixed nitrogen in the *Anthoceros-Nostoc* symbiotic association. *Planta* **164**, 406–414.

**Meeks JC, Enderlin CS, Wycoff KL, Chapman JS, Joseph CM. 1983.** Assimilation of  $^{13}\text{NH}_4^+$  by *Anthoceros* grown with and without symbiotic *Nostoc*. *Planta* **158**, 384–391.

**Meeks JC. 2003.** Symbiotic interactions between *Nostoc punctiforme*, a multicellular cyanobacterium, and the hornwort *Anthoceros punctatus*. *Symbiosis* (Philadelphia, PA), **35**, 55-71.

**Mertz IT, Christians NE, Thoms AW. 2019.** Branched-chain amino acids for use as a nitrogen source on creeping Bentgrass. *HortTechnology* **29**, 833–837.

**Miller AJ, Fan X, Shen Q, Smith SJ. 2008.** Amino acids and nitrate as signals for the regulation of nitrogen acquisition. *Journal of Experimental Botany* **59**, 111–119.

**Murchie EH, Lawson T. 2013.** Chlorophyll fluorescence analysis: a guide to good practice and understanding some new applications. *Journal of Experimental Botany* **64**, 3983–3998.

**Mus F, Crook MB, Garcia K, et al. 2016.** Symbiotic nitrogen fixation and the challenges to its extension to nonlegumes. *Applied and Environmental Microbiology* **82**, 3698–3710.

**Nilsson M, Rasmussen U, Bergman B. 2006.** Cyanobacterial chemotaxis to extracts of host and nonhost plants. *FEMS microbiology ecology*, **55(3)**, 382-390.

**Niyogi KK, Björkman O, Grossman AR.** 1997. The roles of specific xanthophylls in photoprotection. *Proceedings of the National Academy of Sciences of the United States of America* **94**, 14162–14167.

**O’Brian MR.** 1996. Heme synthesis in the rhizobium-legume symbiosis: a palette for bacterial and eukaryotic pigments. *Journal of Bacteriology* **178**, 2471–2478.

**Oldroyd GED.** 2013. Speak, friend, and enter: signalling systems that promote beneficial symbiotic associations in plants. *Nature Reviews Microbiology* **11**, 252–263.

**Ou S, Su W, Liao Y, et al.** 2019. Benchmarking transposable element annotation methods for creation of a streamlined, comprehensive pipeline. *Genome Biology* **20**, 275.

**Pankievicz VCS, Irving TB, Maia LGS, Ané J-M.** 2019. Are we there yet? The long walk towards the development of efficient symbiotic associations between nitrogen-fixing bacteria and non-leguminous crops. *BMC Biology* **17**, 99.

**Paul MJ, Driscoll SP.** 1997. Sugar repression of photosynthesis: the role of carbohydrates in signalling nitrogen deficiency through source:sink imbalance. *Plant, Cell & Environment* **20**, 110–116.

**Paungfoo-Lonhienne C, Lonhienne TGA, Rentsch D, Robinson N, Christie M, Webb RI, Gamage HK, Carroll BJ, Schenk PM, Schmidt S.** 2008. Plants can use protein as a nitrogen source without assistance from other organisms. *Proceedings of the National Academy of Sciences* **105**, 4524–4529.

**Pérez-Jaramillo JE, Mendes R, Raaijmakers JM.** 2016. Impact of plant domestication on rhizosphere microbiome assembly and functions. *Plant Molecular Biology* **90**, 635–644.

**Pertea M, Pertea GM, Antonescu CM, Chang T-C, Mendell JT, Salzberg SL.** 2015. StringTie enables improved reconstruction of a transcriptome from RNA-seq reads. *Nature Biotechnology* **33**, 290–295.

**Rodgers GA, Stewart WDP.** 1977. The Cyanophyte-Hepatic Symbiosis I. Morphology and Physiology. *New Phytologist* **78**, 441–458.

**Sayed OH.** 1998. Analysis of photosynthetic responses and adaptation to nitrogen starvation in *Chlorella* using in vivo chlorophyll fluorescence. *Photosynthetica* **35**, 611–619.

**Sellstedt A, Richau KH.** 2013. Aspects of nitrogen-fixing Actinobacteria, in particular free-living and symbiotic Frankia. *FEMS Microbiology Letters* **342**, 179–186.

**Simão FA, Waterhouse RM, Ioannidis P, Kriventseva EV, Zdobnov EM.** 2015. BUSCO: assessing genome assembly and annotation completeness with single-copy orthologs. *Bioinformatics* **31**, 3210–3212.

**Smit AFA, Hubley R, Green P.** 2013–2015. RepeatMasker Open-4.0.

- Sprent JI, Raven JA.** 1985. Evolution of nitrogen-fixing symbioses. *Proceedings of the Royal Society of Edinburgh, Section B: Biological Sciences* **85**, 215–237.
- Steinberg NA, Meeks JC.** 1991. Physiological sources of reductant for nitrogen fixation activity in *Nostoc* sp. strain UCD 7801 in symbiotic association with *Anthoceros punctatus*. *Journal of Bacteriology* **173**, 7324–7329.
- Sun J, Zheng N.** 2015. Molecular mechanism underlying the plant NRT1.1 dual-affinity nitrate transporter. *Frontiers in Physiology* **6**.
- Suzuki A, Knaff DB.** 2005. Glutamate synthase: structural, mechanistic and regulatory properties, and role in the amino acid metabolism. *Photosynthesis Research* **83**, 191–217.
- Swarbreck SM, Defoin-Platel M, Hindle M, Saqi M, Habash DZ.** 2011. New perspectives on glutamine synthetase in grasses. *Journal of Experimental Botany* **62**, 1511–1522.
- Szövényi P, Gunadi A, Li FW.** 2021. Charting the genomic landscape of seed-free plants. *Nature Plants* **7**, 554–565.
- Tiwari P, Sangwan RS, Sangwan NS.** 2016. Plant secondary metabolism linked glycosyltransferases: An update on expanding knowledge and scopes. *Biotechnology Advances* **34**, 714–739.
- Walker BJ, Abeel T, Shea T, et al.** 2014. Pilon: an integrated tool for comprehensive microbial variant detection and genome assembly improvement. *PloS One* **9**, e112963.
- Walsby AE.** 2007. Cyanobacterial heterocysts: terminal pores proposed as sites of gas exchange. *Trends in Microbiology* **15**, 340–349.
- Wang YY, Cheng YH, Chen KE, Tsay YF.** 2018. Nitrate Transport, Signaling, and Use Efficiency. *Annual Review of Plant Biology* **69**, 85–122.
- Jun XU, Wang XY, Guo WZ.** 2015. The cytochrome P450 superfamily: Key players in plant development and defense. *Journal of Integrative Agriculture* **14**, 1673-1686.
- Yandell B.** 2017. *Practical Data Analysis for Designed Experiments*. Routledge.
- Zalutskaya Z, Kochemasova L, Ermilova E.** 2018. Dual positive and negative control of *Chlamydomonas* PII signal transduction protein expression by nitrate/nitrite and NO via the components of nitric oxide cycle. *BMC Plant Biology* **18**, 305.
- Zhao L-S, Li K, Wang Q-M, et al.** 2017. Nitrogen starvation impacts the photosynthetic performance of *Porphyridium cruentum* as revealed by chlorophyll a fluorescence. *Scientific Reports* **7**, 8542.

## Figure legends

**Figure 1:** Morphological and physiological changes in symbiotic and symbiont-free gametophytes during N-starvation.

Micrographs of colonization of *N. punctiforme* inside the slime cavities of *A. punctatus* gametophytes (A) and symbiont-free *A. punctatus* gametophytes (B), and their visual changes with time during N-starvation. Average rates ( $\pm$ SE) of acetylene reduction (nitrogenase activity) from symbiotic gametophytes (C). Average content ( $\pm$ SE) of total chlorophyll (D) and dark-adapted (20-minute darkening) maximum quantum yield of PS II estimated by chlorophyll fluorescence ( $F_v/F_m$ ) (E) in the gametophytes of symbiotic and symbiont-free *A. punctatus* under N-starvation conditions.

**Figure 2:** Temporal expression profiles for differentially transcribed genes from cocultured and symbiont-free *A. punctatus* gametophytes.

The number of clusters was user selected and then arbitrarily numbered by the algorithm. The ordinate is the median log of the VST normalized gene expression for that set of genes ( $P \leq 0.05$ ). The abscissa is time in days since initiation of N-starvation. Orange and green lines indicate differential gene expression profiles of symbiont-free and cocultured gametophytes, respectively.

**Figure 3:** Temporal patterns of normalized expression of genes encoding proteins involved in photosynthesis.

The ordinate is the mean ( $\pm$ SE) normalized gene expression of transcripts ( $P < 0.05$ ). The differentially expressed genes encode proteins for: a representative light harvesting complex (A), enhanced  $O_2$  evolution (B), PS II reaction centers (C), PS I reaction centers (D), RuBisCO small subunit (E), and xanthophyll metabolism (F), from cocultured and symbiont-free *A. punctatus* gametophytes. Time is in days as in Fig. 2.

**Figure 4:** Temporal patterns of normalized expression for genes involved in N acquisition and assimilation.

The ordinate is the mean ( $\pm$ SE) normalized gene expression of transcripts ( $P < 0.05$ ). The selected genes encode: an ammonium transporter (A), a nitrate transporter (NRT 2.2), (B) a nitrate transporter (NRT 1.1) (C), PII signal transduction (D), a plasmid localized glutamine synthetase (GS2) (E), a cytosolic glutamine synthetase (GS1;1) (F), the expressed NADH glutamate synthase (G), and the complete Fd glutamate synthase (H), from cocultured and symbiont-free gametophytes. Time is in days as in Fig. 2.

**Figure 5:** Temporal patterns of normalized expression for genes involved in potential reductant sinks for photosynthetically generated reductant.

The ordinate is the mean ( $\pm$ SE) normalized gene expression of transcripts ( $P < 0.05$ ). The selected genes encode: glycosyltransferase (A), a cytochrome P450 (B), terpenes (C), from cocultured and symbiont-free gametophytes. Time is in days as in Fig. 2.

**Figure 6:** Temporal patterns of normalized expression for genes involved in symbiotic interactions.

The ordinate is mean ( $\pm$ SE) of normalized expression of genes encoding the proteins: Castor (A), Cyclops (B), STR1 (C), STR2 (D), SymRK (E), CCamK (F), Vapyrin (G), RAD1 (H), RAM1

(I), LysM receptor like kinase (J), SWEET transporter (K) from cocultured and symbiont-free *A. punctatus* gametophytes. Time is in days as in Fig. 2. All data except LysM (J) and SWEET (K) were obtained from the transcriptome. LysM and SWEET sorted into the differential transcriptome, while STR2 and RAM1 did not.

Day 7

Day 10

Day 14

Day 28

A

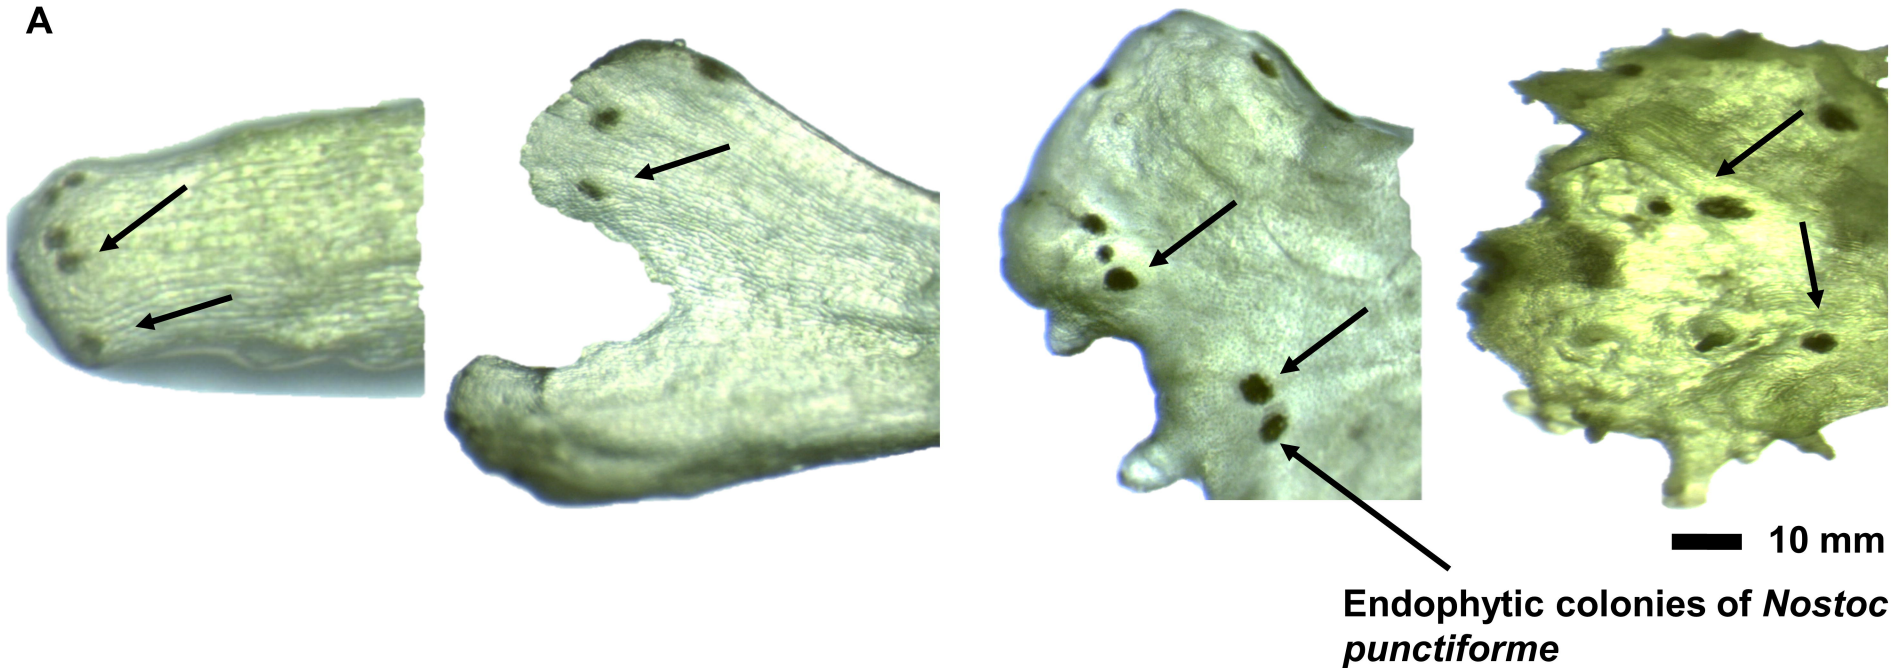

B

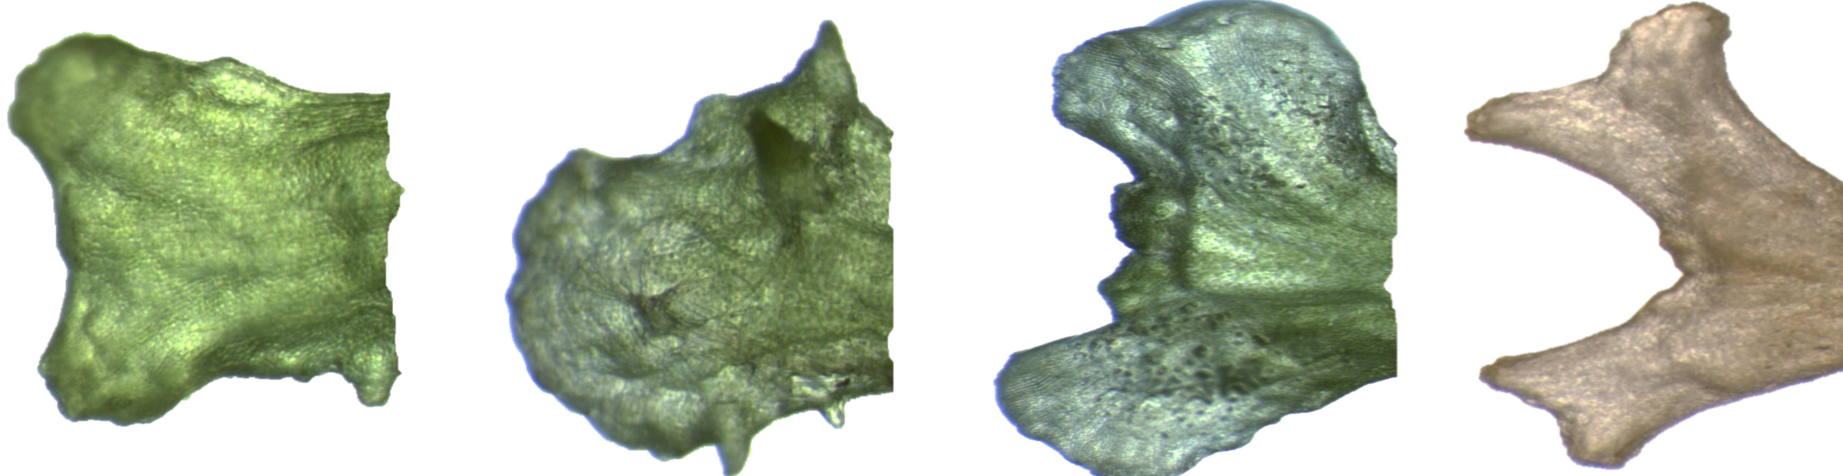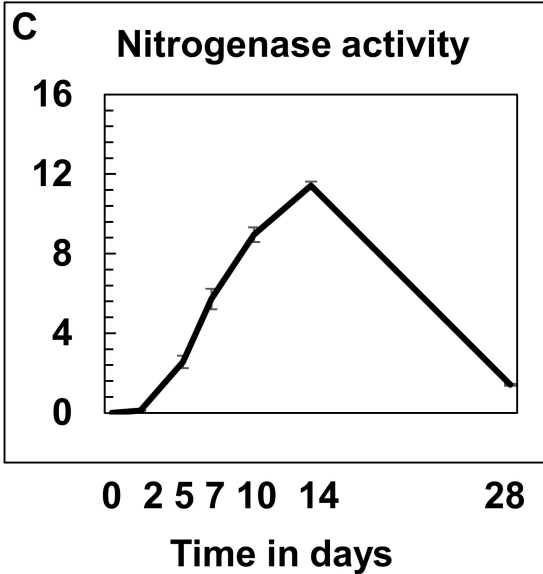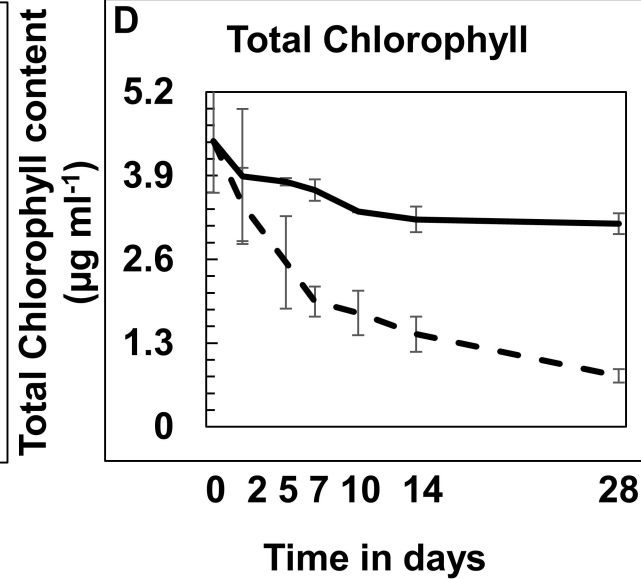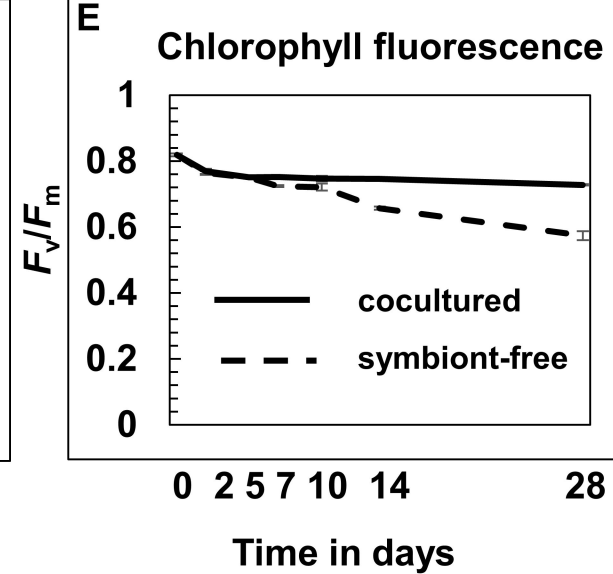



### Cluster 1

Median profile of 156 genes

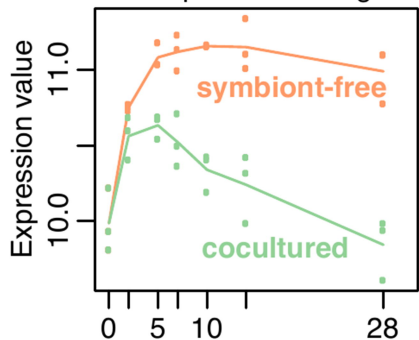

### Cluster 2

Median profile of 178 genes

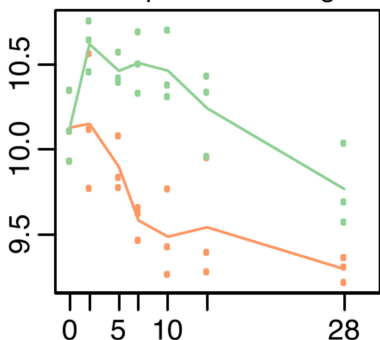

### Cluster 3

Median profile of 203 genes

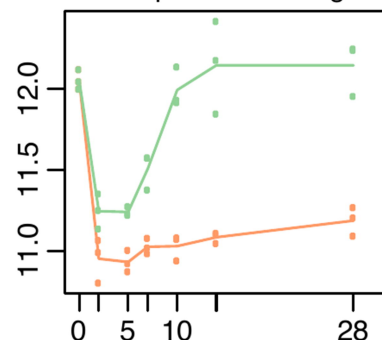

### Cluster 4

Median profile of 182 genes

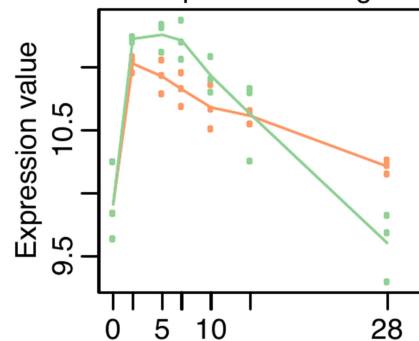

### Cluster 5

Median profile of 178 genes

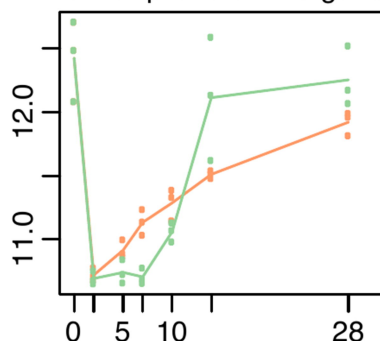

### Cluster 6

Median profile of 181 genes

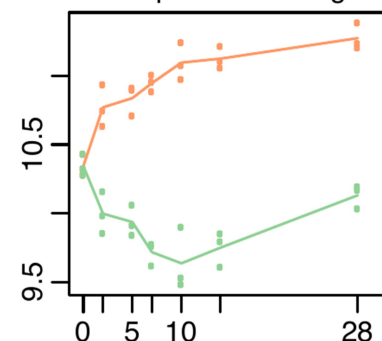

### Cluster 7

Median profile of 255 genes

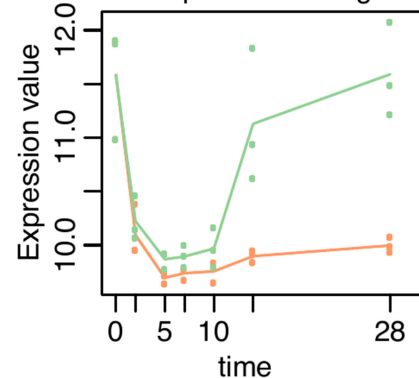

### Cluster 8

Median profile of 21 genes

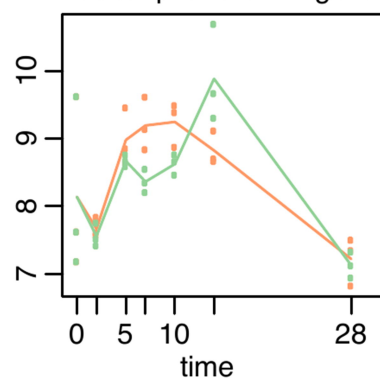

### Cluster 9

Median profile of 95 genes

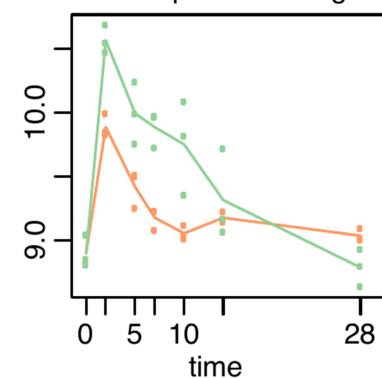

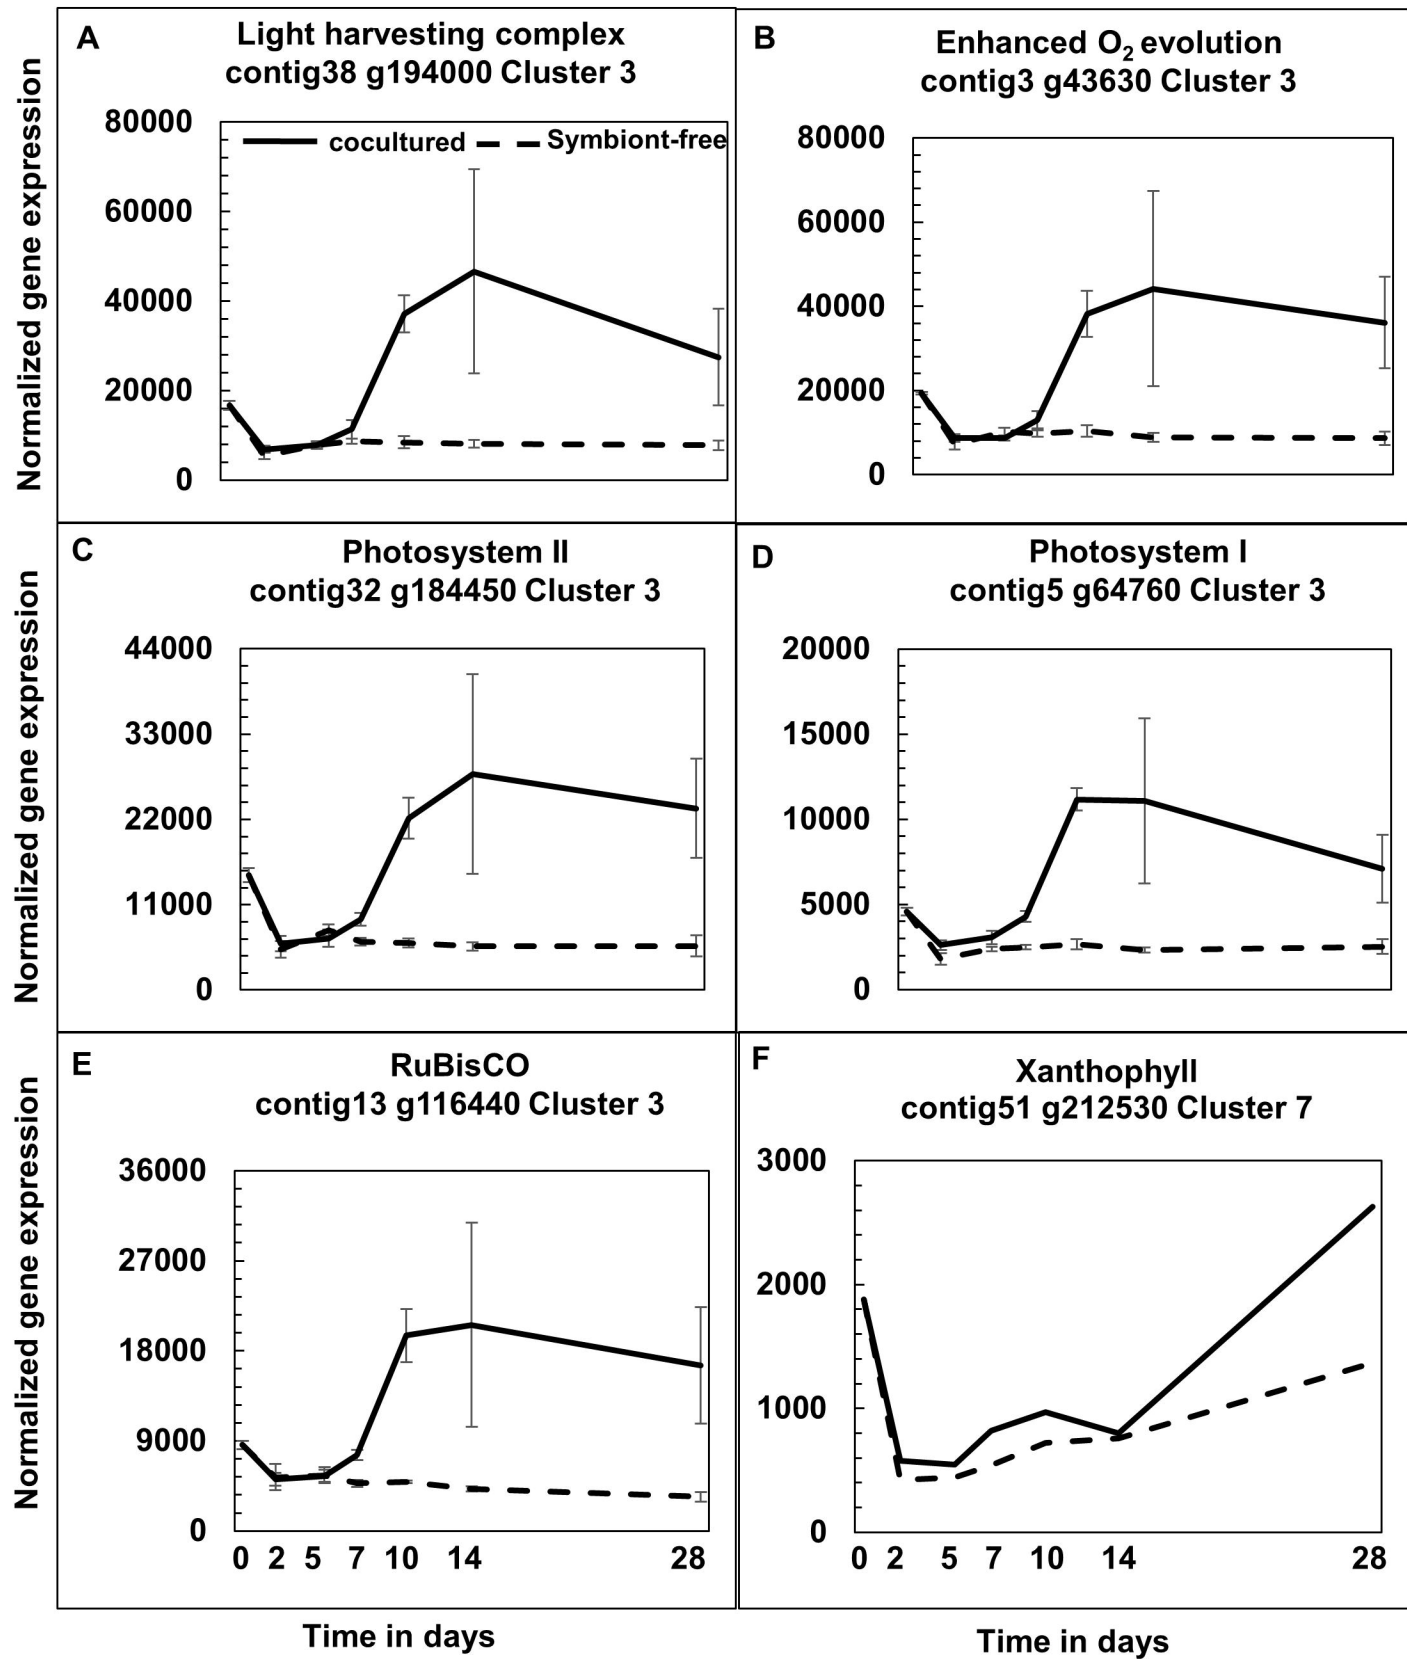

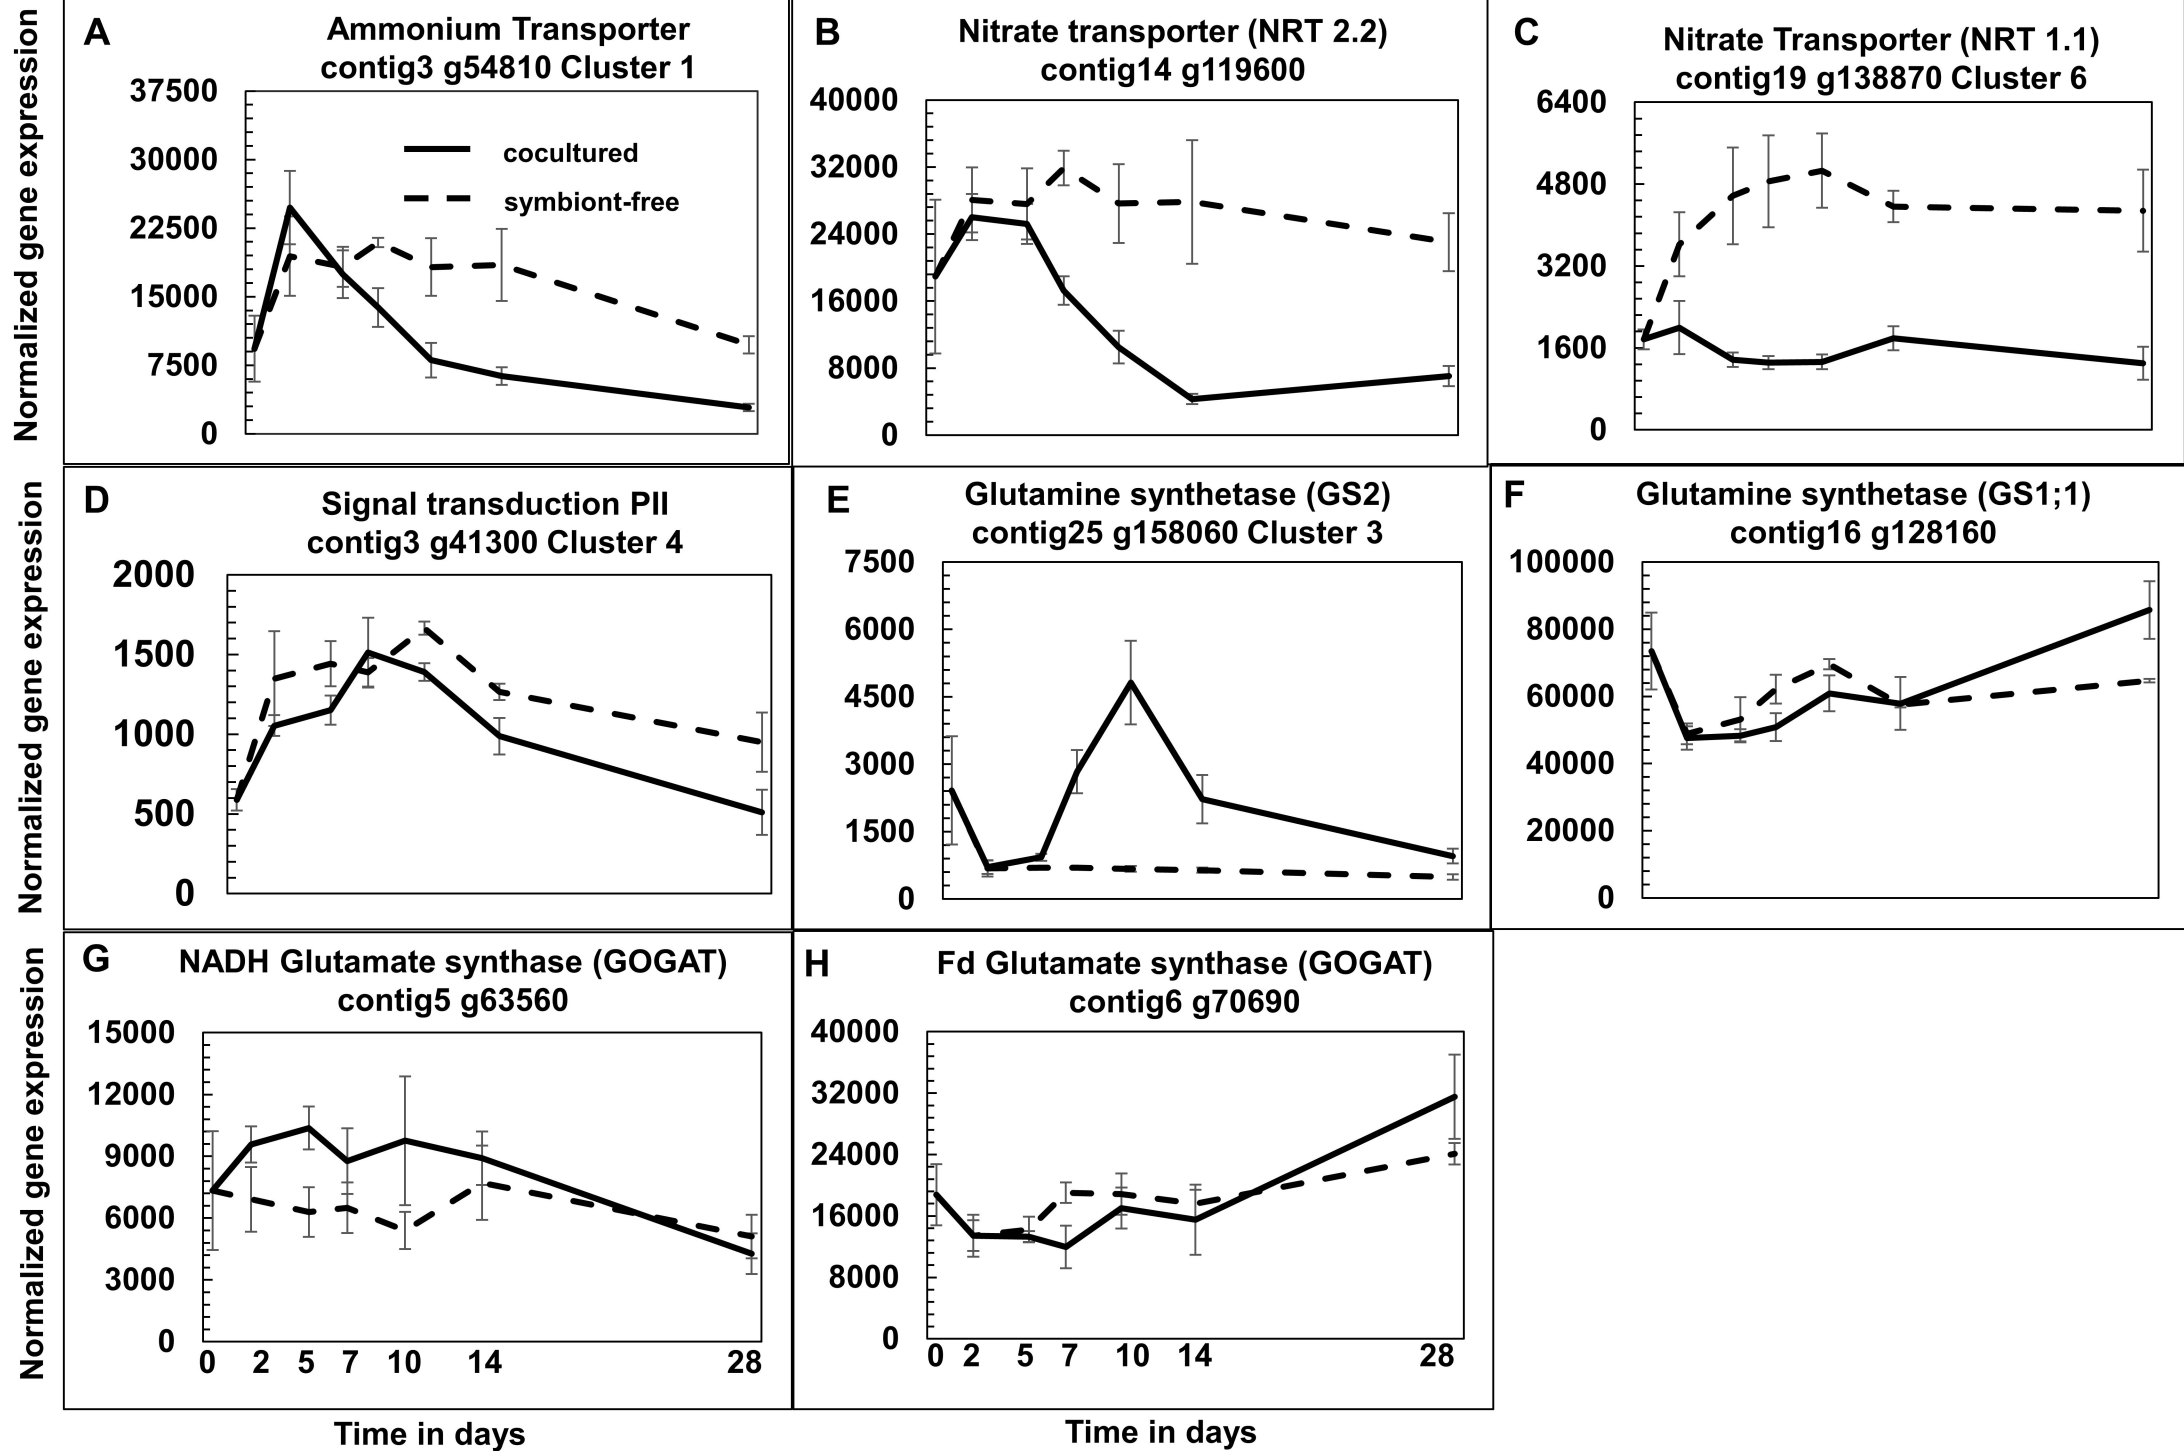

Normalized gene expression

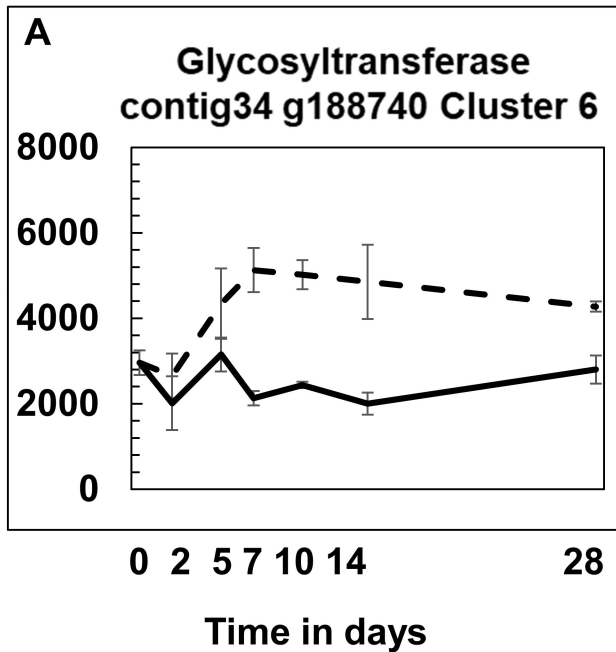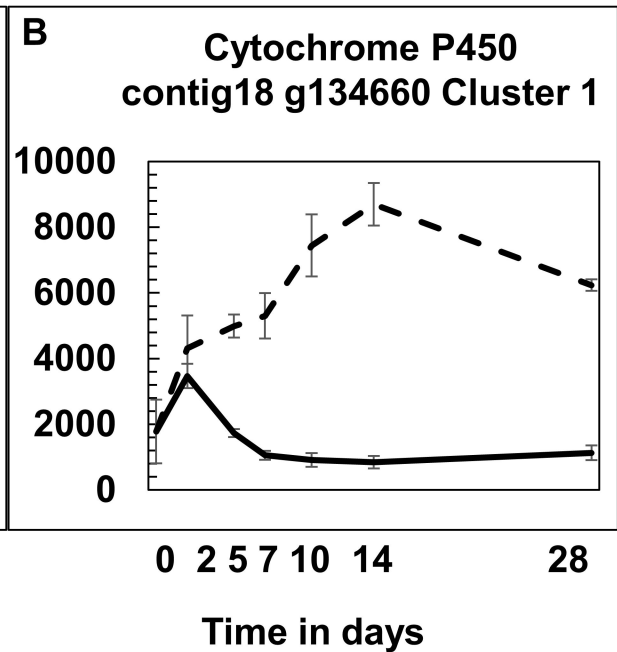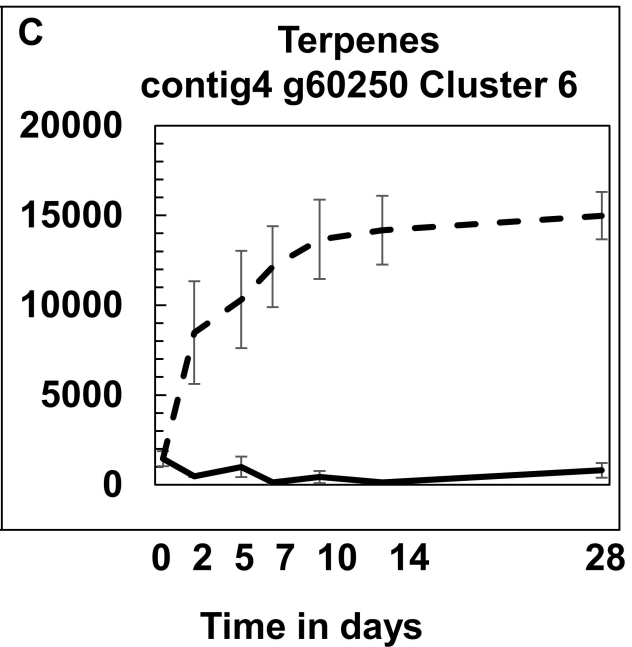

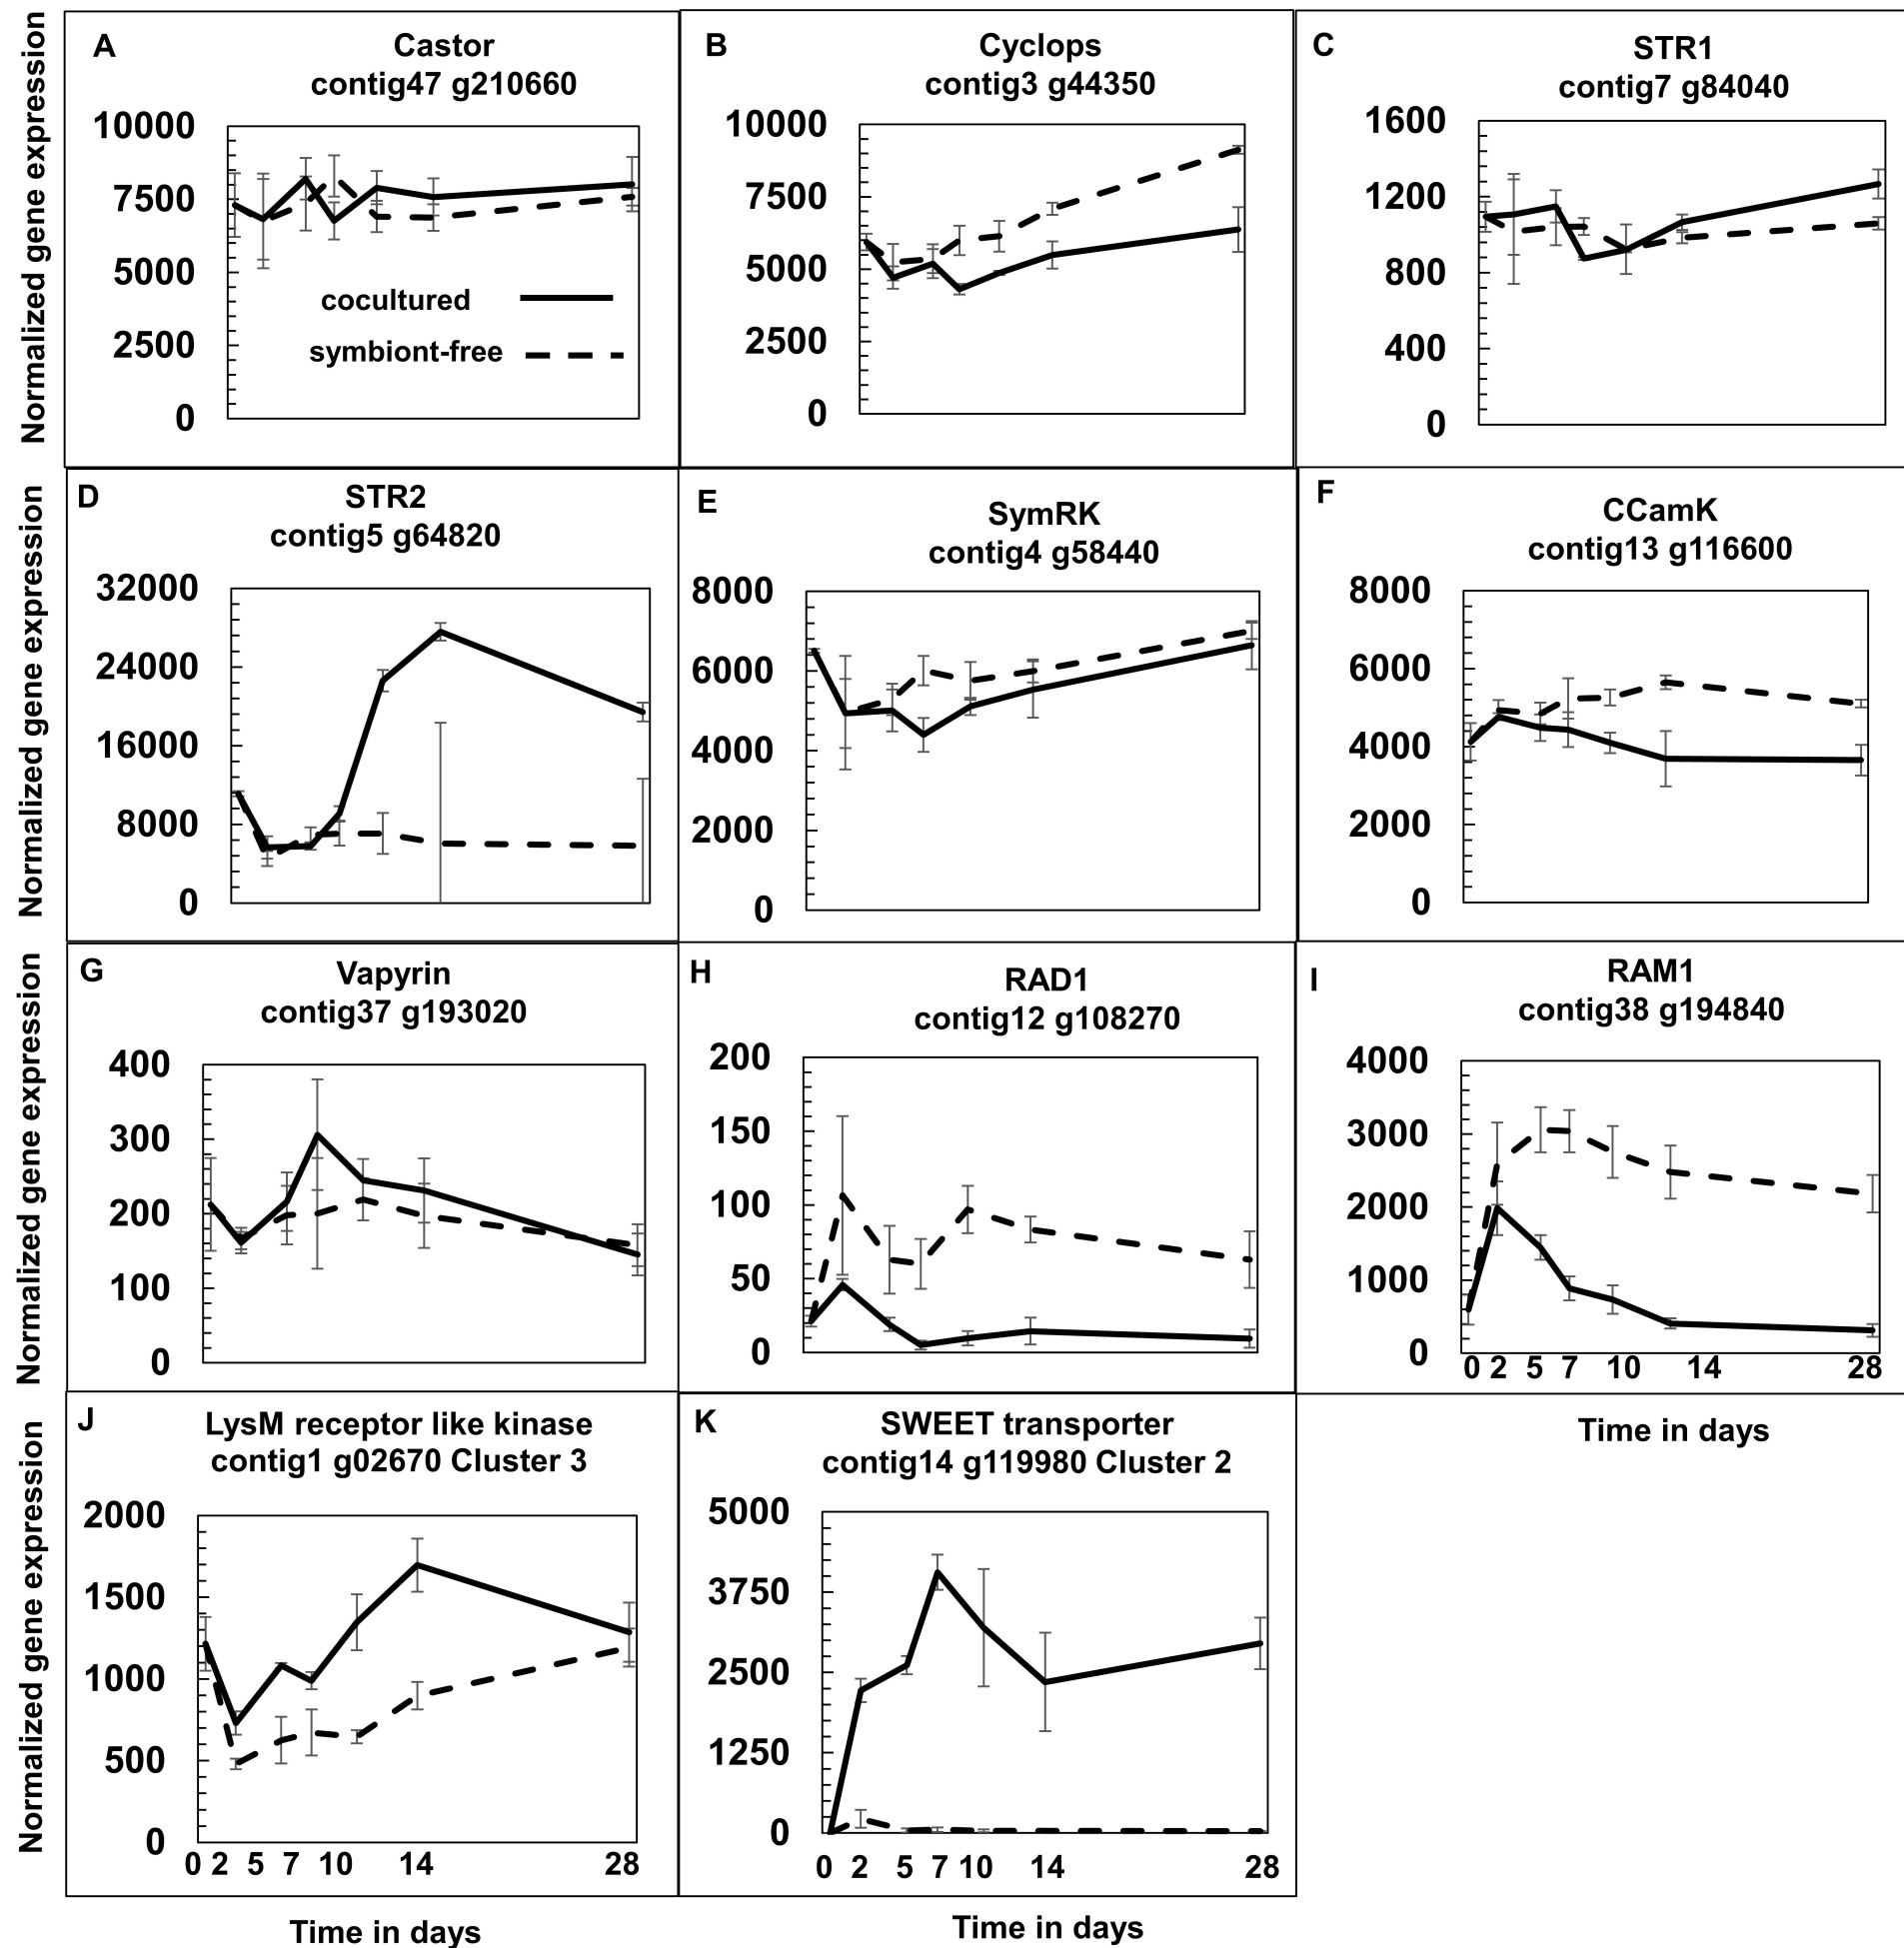

Source: https://www.biorxiv.org/content/10.1101/2021.10.27.465970v1.full.pdf
